# Supplementary material for: The SANAD II study of the effectiveness and cost-effectiveness of levetiracetam, zonisamide, or lamotrigine for newly diagnosed focal epilepsy: an open-label, non-inferiority, multicentre, phase 4, randomised controlled trial
Source: PubMed Central journal article supplement (PMC8047799; doi:10.1016/s0140-6736(21)00247-6), 2021-04-10
Supplement: mmc3.pdf [file mmc3.pdf]

# THE LANCET

## Supplementary appendix

This appendix formed part of the original submission and has been peer reviewed. We post it as supplied by the authors.

Supplement to: Marson A, Burnside G, Appleton R, et al. The SANAD II study of the effectiveness and cost-effectiveness of levetiracetam, zonisamide, or lamotrigine for newly diagnosed focal epilepsy: an open-label, non-inferiority, multicentre, phase 4, randomised controlled trial. *Lancet* 2021; **397**: 1363–74.

**The SANAD II study of the effectiveness and cost-effectiveness of levetiracetam, zonisamide, or lamotrigine for newly diagnosed focal epilepsy: an open-label, non-inferiority, multicentre, phase 4, randomised controlled trial**

**Table 1. HR estimates for time to 12-month remission**

| <b>Model and analysis set</b>                                                          | <b>Lamotrigine versus levetiracetam HR (97.5% CI)</b> | <b>Lamotrigine versus zonisamide HR (97.5% CI)</b> |
|----------------------------------------------------------------------------------------|-------------------------------------------------------|----------------------------------------------------|
| Primary analysis: Cox model with treatment (ITT)                                       | 1.18 (0.96 to 1.47)                                   | 1.03 (0.83 to 1.28)                                |
| Cox model with treatment (ITT), gender, number of seizures and centre as random effect | 1.13 (0.91 to 1.41)                                   | 1.01 (0.81 to 1.25)                                |
| Fine and Gray model with treatment (PP)                                                | 1.32 <sup>1</sup> (1.05 to 1.66)                      | 1.37 <sup>1</sup> (1.08 to 1.73)                   |

HR > 1 indicates benefit to lamotrigine. ITT: Intention to treat. PP: Per Protocol

<sup>1</sup> Ratio of rate of occurrence of 12-month remission in patients who are currently event free or who have previously failed randomised treatment

**Table 2. Annual time to 12-month remission probability estimates from Kaplan Meier analysis**

|                                                                                          | Events/<br>total | Year 1         | Year 2         | Year 3          | Year 4         | Year 5          |
|------------------------------------------------------------------------------------------|------------------|----------------|----------------|-----------------|----------------|-----------------|
| Number at risk                                                                           |                  |                |                |                 |                |                 |
| Lamotrigine                                                                              | 222/330          | 291            | 92             | 34              | 12             | 2               |
| Levetiracetam                                                                            | 204/332          | 293            | 107            | 57              | 22             | 5               |
| Zonisamide                                                                               | 209/328          | 284            | 92             | 29              | 10             | 2               |
| Percentage 12-month remission<br>(95% CI)                                                |                  |                |                |                 |                |                 |
| Lamotrigine                                                                              |                  | 34<br>(29,39)  | 63<br>(58, 69) | 79<br>(74, 84)  | 82<br>(77, 88) | 86<br>(80, 92)  |
| Percentage 12-month remission<br>(95% CI)                                                |                  |                |                |                 |                |                 |
| Levetiracetam                                                                            |                  | 37<br>(32, 43) | 59<br>(53, 64) | 70<br>(64, 76)  | 77<br>(71, 82) | 79<br>(73, 85)  |
| Percentage 12-month remission<br>(95% CI)                                                |                  |                |                |                 |                |                 |
| Zonisamide                                                                               |                  | 35<br>(29, 40) | 63<br>(57, 68) | 78<br>(72, 84)  | 84<br>(78, 90) | 91<br>(83, 100) |
| Difference in percentage of 12-<br>month remission compared with<br>Lamotrigine (95% CI) |                  |                |                |                 |                |                 |
| Levetiracetam                                                                            |                  | 3<br>(-5, 11)  | -5<br>(-13, 3) | -9<br>(-17, -2) | -6<br>(-14, 2) | -7<br>(-16, 1)  |
| Zonisamide                                                                               |                  | 1<br>(-7, 9)   | -1<br>(-9, 7)  | -1<br>(-9, 7)   | 2<br>(-6, 10)  | 5<br>(-5, 16)   |

Web figure 1. Cumulative incidence of time to 12 month remission from per protocol analysis: Lamotrigine versus levetiracetam versus zonisamide.

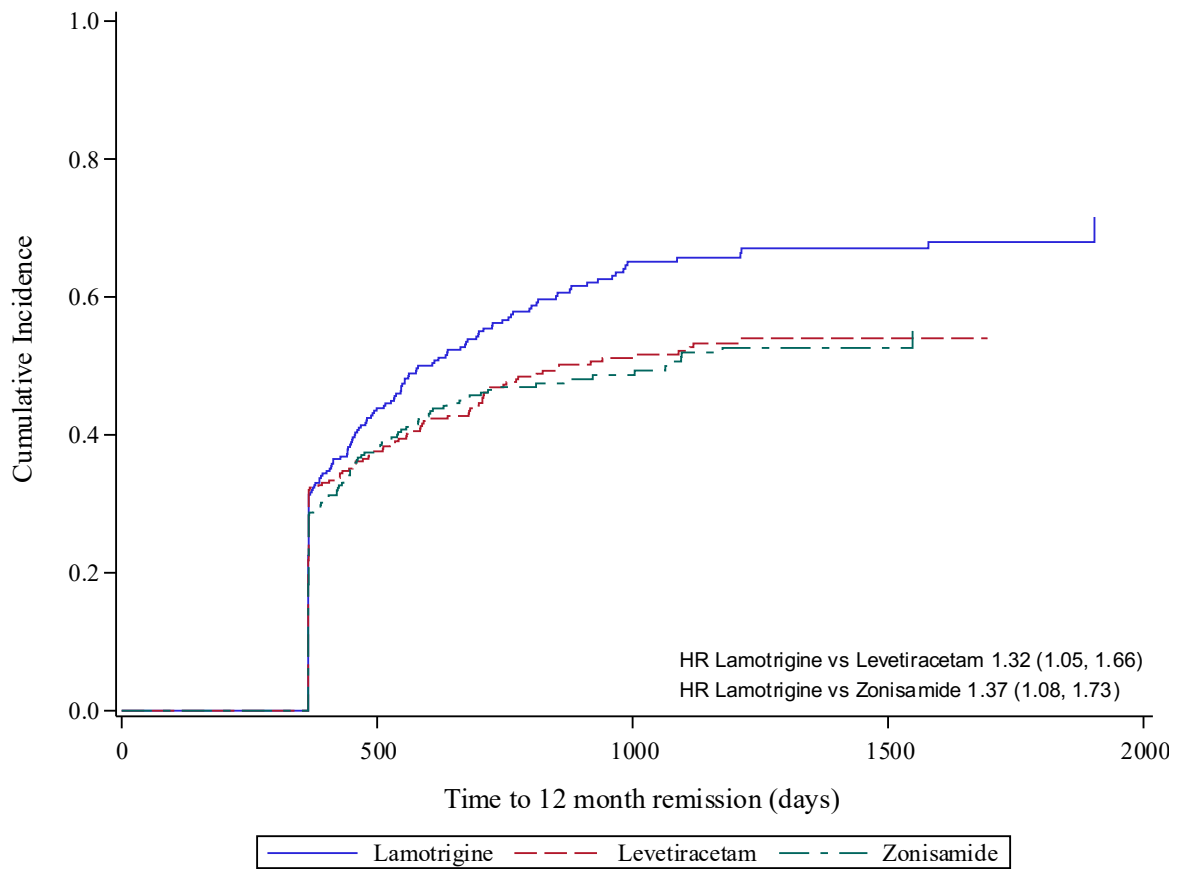

Web figure 2. Kaplan Meier plot of time to 24 month remission: Lamotrigine versus levetiracetam versus zonisamide.

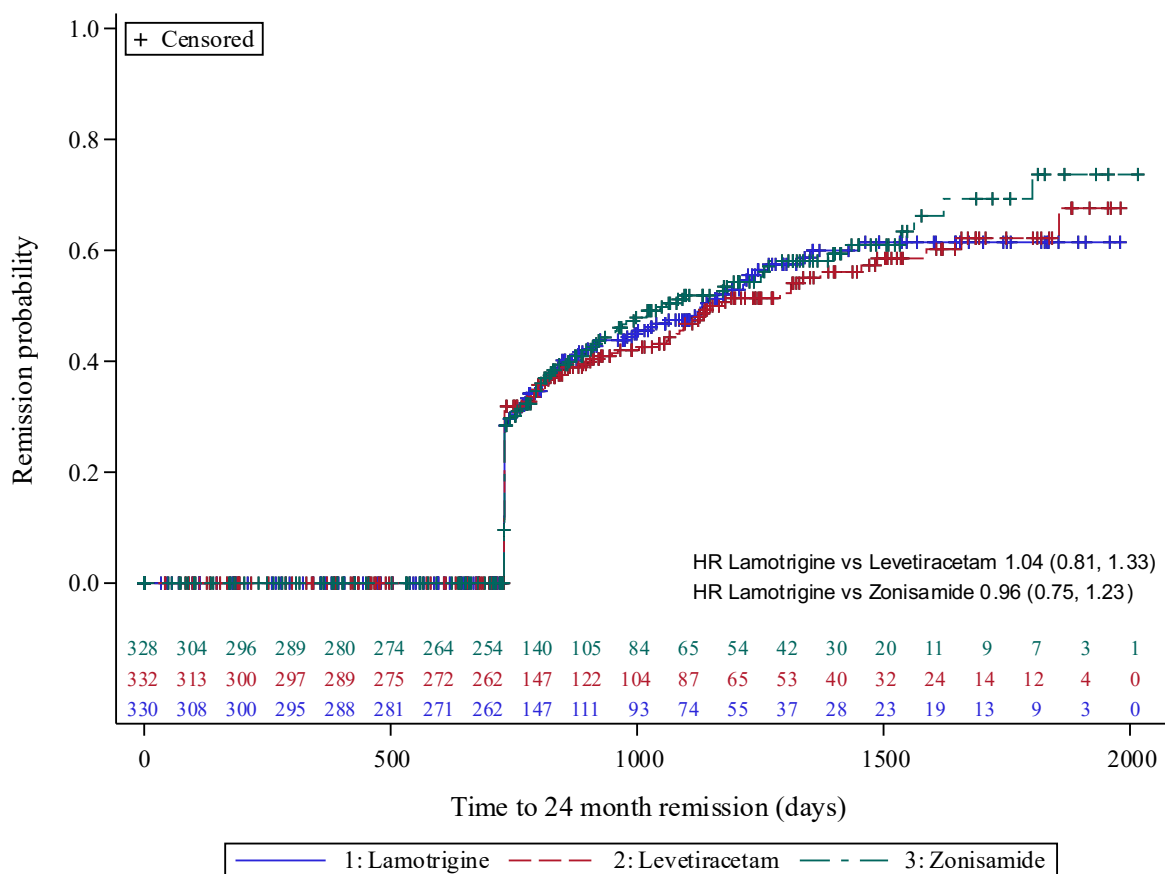

Web figure 3. Kaplan Meier plot of time to first seizure: Lamotrigine versus levetiracetam versus zonisamide.

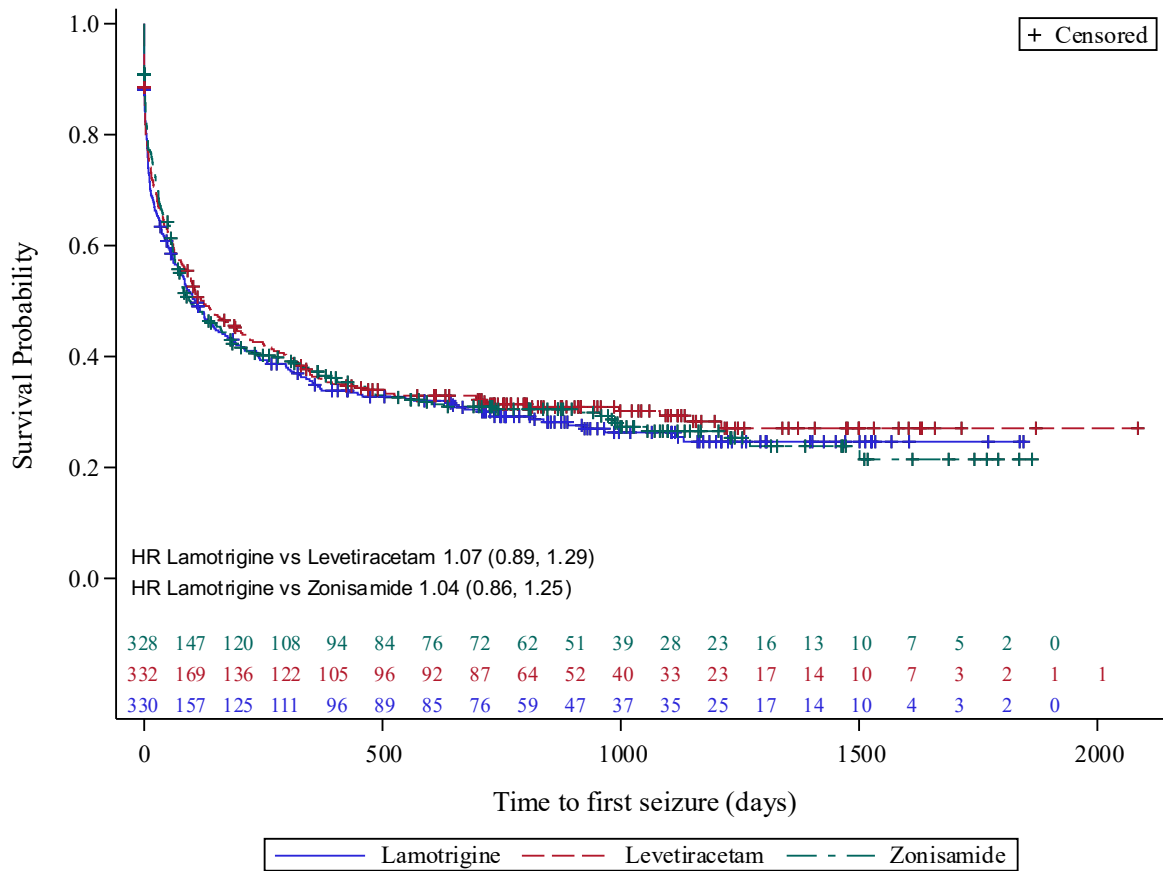

**Table 3. Time to treatment failure probabilities from Kaplan Meier analysis**

|                                                                                | Events/<br>total | Year 1         | Year 2         | Year 3         | Year 4         | Year 5         |
|--------------------------------------------------------------------------------|------------------|----------------|----------------|----------------|----------------|----------------|
| Number at risk                                                                 |                  |                |                |                |                |                |
| Lamotrigine                                                                    | 97/330           | 241            | 192            | 101            | 36             | 8              |
| Levetiracetam                                                                  | 146/332          | 212            | 157            | 74             | 25             | 7              |
| Zonisamide                                                                     | 167/328          | 185            | 128            | 59             | 23             | 7              |
| Percentage without failure (95% CI)<br>Lamotrigine                             |                  | 80<br>(75, 84) | 76<br>(71, 80) | 68<br>(62, 73) | 61<br>(53, 68) | 61<br>(53, 68) |
| Percentage without failure (95% CI)<br>Levetiracetam                           |                  | 70<br>(65, 75) | 60<br>(54, 65) | 52<br>(46, 58) | 45<br>(37, 52) | 45<br>(37, 52) |
| Percentage without failure (95% CI)<br>Zonisamide                              |                  | 64<br>(58, 69) | 53<br>(47, 59) | 45<br>(39, 52) | 37<br>(30, 45) | 27<br>(16, 37) |
| Difference in percentage with<br>failure compared with Lamotrigine<br>(95% CI) |                  |                |                |                |                |                |
| Levetiracetam                                                                  |                  | 10<br>(3, 17)  | 16<br>(8, 23)  | 16<br>(7, 24)  | 16<br>(5, 27)  | 16<br>(5, 27)  |
| Zonisamide                                                                     |                  | 16<br>(9, 23)  | 23<br>(15, 30) | 22<br>(14, 30) | 23<br>(13, 34) | 34<br>(21, 47) |

**Table 4.** Doses taken by participants aged 12 years and above at treatment withdrawal or last follow up

| Reason for withdrawal                                                                            | Lamotrigine                                       | Levetiracetam                                          | Zonisamide                                           |
|--------------------------------------------------------------------------------------------------|---------------------------------------------------|--------------------------------------------------------|------------------------------------------------------|
| Inadequate seizure control<br>First follow-up/Missing <sup>1</sup><br>Mean mg (s.d.)<br>Range mg | n=14<br>(FF=1)<br>267 (152)<br>75 to 500          | n=16<br>(FF=1, missing=1)<br>2214 (955)<br>500 to 3500 | n=25<br>(FF=1)<br>277 (136)<br>100 to 550            |
| Unacceptable adverse<br>Events<br>First follow-up/Missing<br>Mean mg (s.d.)<br>Range mg          | n=34<br>(FF=16)<br>171 (69)<br>50 to 300          | n=63<br>(FF=18)<br>1089 (473)<br>10 to 2500            | n=77<br>(FF=20, missing=3)<br>205 (101)<br>25 to 500 |
| Other reason for<br>withdrawal<br>First follow-up/Missing<br>Mean mg (s.d.)<br>Range mg          | n=17<br>(FF=6)<br>164 (94)<br>75 to 400           | n=17<br>(FF=8)<br>1188 (667)<br>500 to 3000            | n=28<br>(FF=9, missing=1)<br>242 (83)<br>150 to 400  |
| Remission of seizures<br>First follow-up/Missing<br>Mean mg (s.d.)<br>Range mg                   | n=7<br>0<br>183 (149)<br>50 to 500                | n=7<br>FF=1<br>1029 (221)<br>800 to 1500               | n=10<br>FF=1<br>200 (61)<br>100 to 250               |
| Still on randomised drug<br>Missing<br>Mean mg (s.d.)<br>Range mg                                | n=238<br>(missing n=11)<br>222 (116)<br>50 to 700 | n=188<br>(missing n=10)<br>1440 (726)<br>250 to 4000   | n=149<br>(missing n=17)<br>247 (112)<br>25 to 600    |

<sup>1</sup> For patients who had withdrawn from drug at or before first follow-up, no information on the final dose was collected. FF denotes these patients, missing denotes other patients with missing dose information



Web figure 4. Cumulative incidence plots from time to treatment failure competing risks analysis: Lamotrigine versus levetiracetam versus zonisamide.

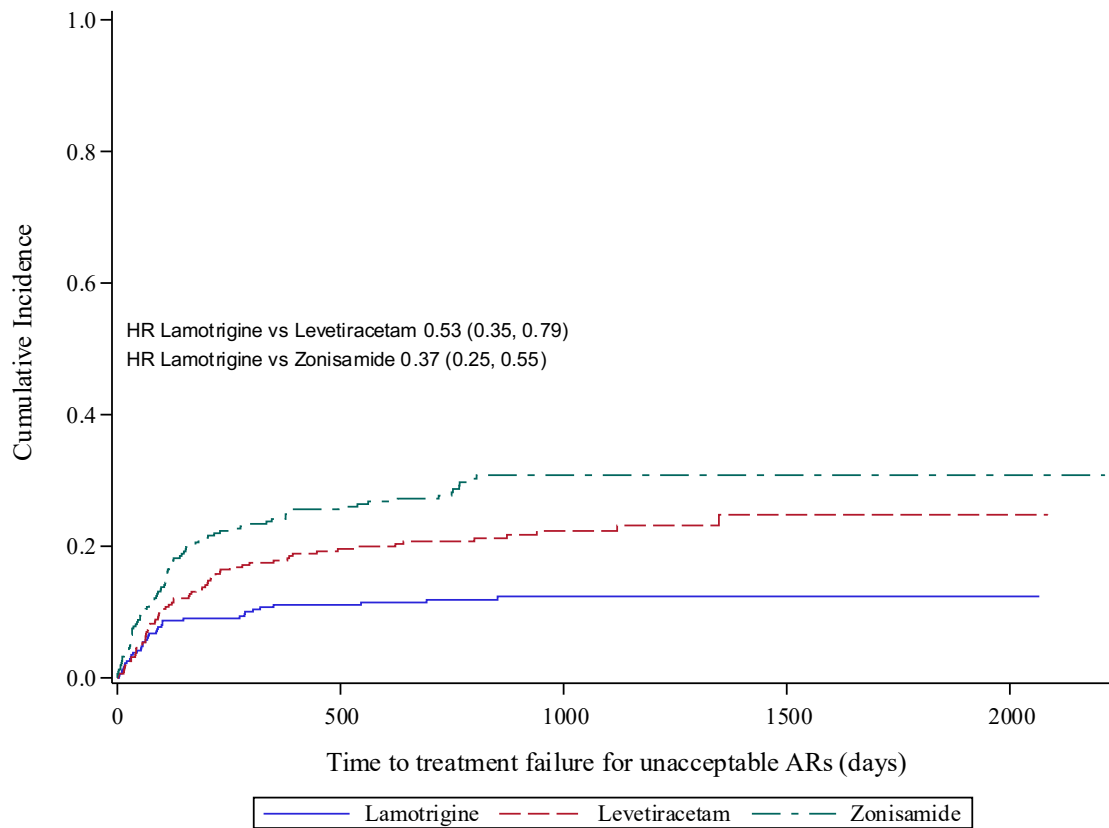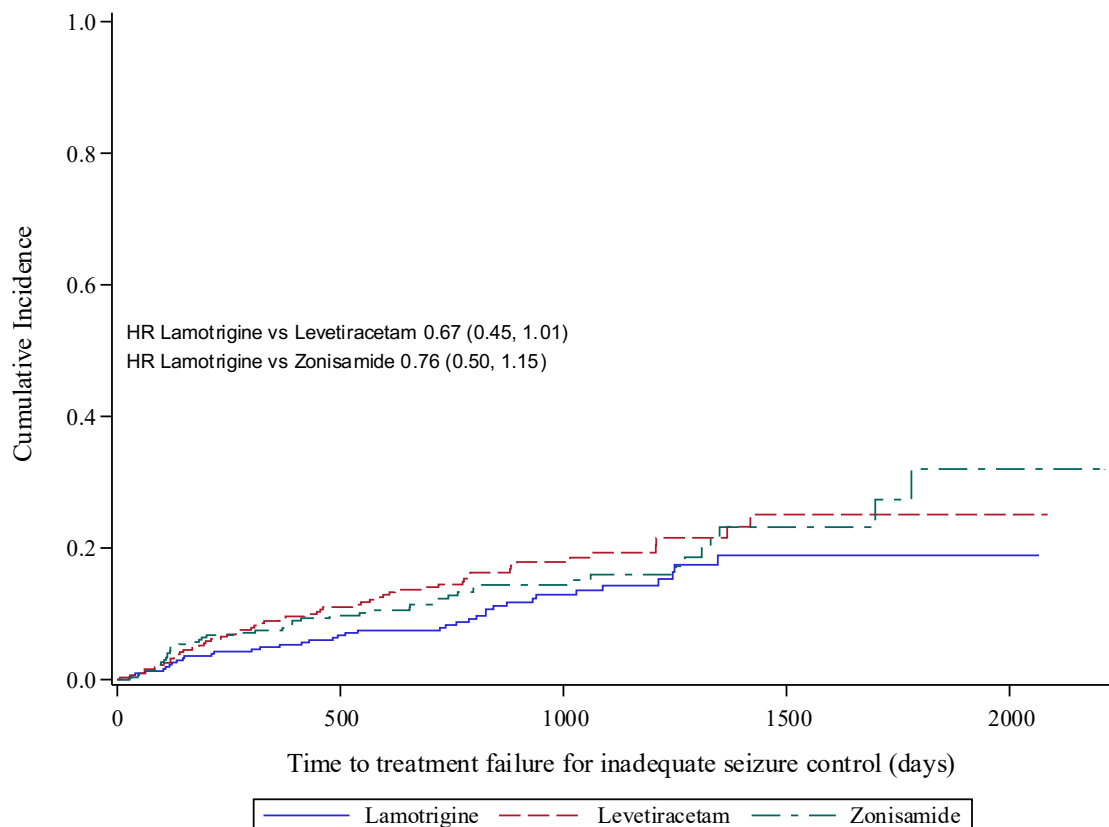

Web table 5. Comparison of the characteristics of those that did and did not return quality of life questionnaires

|                                                                        | No return        | Return           | Total            |
|------------------------------------------------------------------------|------------------|------------------|------------------|
| Age (years)                                                            |                  |                  |                  |
| n                                                                      | 497              | 493              | 990              |
| Mean (S.D.)                                                            | 34.2 (18.6)      | 44.5 (22.3)      | 39.3 (21.2)      |
| Median (IQR)                                                           | 32.2 (20.2,45.1) | 44.9 (24.8,64.2) | 37.7 (22.6,54.5) |
| Range                                                                  | 5.0 to 88.8      | 5.0 to 91.9      | 5.0 to 91.9      |
| Missing                                                                | 0                | 0                | 0                |
| Gender                                                                 |                  |                  |                  |
| n                                                                      | 497              | 493              | 990              |
| Male                                                                   | 288 (57.9%)      | 273 (55.4%)      | 561 (56.7%)      |
| Female                                                                 | 209 (42.1%)      | 220 (44.6%)      | 429 (43.3%)      |
| Learning disability                                                    |                  |                  |                  |
| n                                                                      | 497              | 493              | 990              |
| Yes                                                                    | 28 (5.6%)        | 17 (3.4%)        | 45 (4.5%)        |
| No                                                                     | 469 (94.4%)      | 476 (96.6%)      | 945 (95.5%)      |
| Neurological deficit                                                   |                  |                  |                  |
| n                                                                      | 497              | 493              | 990              |
| Yes                                                                    | 28 (5.6%)        | 16 (3.2%)        | 44 (4.4%)        |
| No                                                                     | 469 (94.4%)      | 477 (96.8%)      | 946 (95.6%)      |
| Previous or current neurological disorder                              |                  |                  |                  |
| Stroke/cerebrovascular                                                 | 21 (4.2%)        | 26 (5.3%)        | 47 (4.7%)        |
| Cerebral haemorrhage                                                   | 10 (2.0%)        | 4 (0.8%)         | 14 (1.4%)        |
| Intracranial surgery                                                   | 12 (2.4%)        | 8 (1.6%)         | 20 (2.0%)        |
| Head injury: Post traumatic amnesia>24h or compound depressed fracture | 10 (2.0%)        | 8 (1.6%)         | 18 (1.8%)        |
| Meningitis/encephalitis                                                | 9 (1.8%)         | 8 (1.6%)         | 17 (1.7%)        |
| Cortical dysplasia/developmental anomaly                               | 4 (0.8%)         | 0                | 4 (0.4%)         |
| Other                                                                  | 29 (5.8%)        | 40 (8.1%)        | 69 (7.0%)        |
| History                                                                |                  |                  |                  |
| Febrile convulsions                                                    | 27 (5.4%)        | 17 (3.4%)        | 44 (4.4%)        |
| Any other acute symptomatic seizures                                   | 10 (2.0%)        | 9 (1.8%)         | 19 (1.9%)        |
| Family history of epilepsy in primary relatives                        | 71 (14.3%)       | 36 (7.3%)        | 107 (10.8%)      |

NOTE: Return group includes those who were included in any longitudinal analyses – i.e. returned baseline questionnaire and at least one other time point (child, parent or adult)

Web table 6. Quality of life analysis: Adults

| QoL variable           | Number patients included in analysis | Treatment effect estimate (LTG vs LEV) <sup>1</sup> | 95% CI       | p-value | Treatment effect estimate (LTG vs ZON) <sup>1</sup> | 95% CI       | p-value |
|------------------------|--------------------------------------|-----------------------------------------------------|--------------|---------|-----------------------------------------------------|--------------|---------|
| <b>Adults</b>          |                                      |                                                     |              |         |                                                     |              |         |
| Adverse events profile | 405                                  | -1.39                                               | -3.14, 0.36  | 0.118   | -0.89                                               | -2.67, 0.89  | 0.327   |
| Anxiety                | 406                                  | -1.33                                               | -2.03, -0.64 | <0.001  | -0.22                                               | -0.93, 0.49  | 0.544   |
| Depression             | 406                                  | -1.20                                               | -1.83, -0.56 | <0.001  | -0.80                                               | -1.45, -0.15 | 0.015   |
| Mastery                | 364                                  | 0.36                                                | -0.19, 0.91  | 0.199   | 0.32                                                | -0.25, 0.89  | 0.276   |
| Stigma                 | 365                                  | -0.50                                               | -0.96, -0.05 | 0.031   | 0.01                                                | -0.46, 0.48  | 0.967   |
| Impact                 | 362                                  | 1.86                                                | 0.73, 3.00   | 0.001   | 1.82                                                | 0.65, 2.99   | 0.002   |
| Overall QoL            | 358                                  | -0.52                                               | -0.77, -0.26 | <0.001  | -0.41                                               | -0.67, -0.15 | 0.002   |

<sup>1</sup> Negative treatment effect estimates favour Lamotrigine, with the exception of Mastery and Impact, where positive estimates favour Lamotrigine

Web table 7. Quality of life analysis: children.

| QoL variable                    | Number patients included in analysis | Treatment effect estimate (LTG vs LEV) <sup>1</sup> | 95% CI        | p-value | Treatment effect estimate (LTG vs ZON) <sup>1</sup> | 95% CI        | p-value |
|---------------------------------|--------------------------------------|-----------------------------------------------------|---------------|---------|-----------------------------------------------------|---------------|---------|
| <b>Children (self-reported)</b> |                                      |                                                     |               |         |                                                     |               |         |
| Attitude to epilepsy            | 32                                   | -1.40                                               | -17.38, 14.58 | 0.860   | -9.46                                               | -23.79, 4.86  | 0.189   |
| QoL Physical                    | 31                                   | -0.89                                               | -17.27, 15.50 | 0.913   | -1.01                                               | -16.10, 14.08 | 0.892   |
| QoL Emotional                   | 31                                   | -8.01                                               | -19.99, 3.97  | 0.184   | -6.31                                               | -17.26, 4.65  | 0.251   |
| QoL Self esteem                 | 30                                   | -9.54                                               | -25.85, 6.77  | 0.243   | 4.97                                                | -10.16, 20.09 | 0.510   |
| QoL Social                      | 31                                   | -1.86                                               | -12.87, 9.15  | 0.734   | 1.87                                                | -8.56, 12.29  | 0.718   |
| QoL Family                      | 31                                   | -13.82                                              | -29.44, 1.80  | 0.081   | -7.44                                               | -21.84, 6.96  | 0.302   |
| QoL School                      | 30                                   | -18.75                                              | -32.88, -4.62 | 0.011   | -12.43                                              | -25.35, 0.50  | 0.059   |
| Impact of epilepsy              | 7                                    | 1.82                                                | -27.06, 30.70 | 0.888   | -4.81                                               | -27.58, 17.95 | 0.639   |
| <b>Parent proxy reported</b>    |                                      |                                                     |               |         |                                                     |               |         |
| QoL Physical                    | 62                                   | -4.22                                               | -13.93, 5.48  | 0.391   | -6.10                                               | -15.49, 3.28  | 0.201   |
| QoL Emotional                   | 61                                   | 0.10                                                | -9.09, 9.29   | 0.983   | 0.34                                                | -8.32, 9.00   | 0.938   |
| QoL Self esteem                 | 60                                   | -5.44                                               | -13.58, 2.70  | 0.189   | -2.39                                               | -10.15, 5.37  | 0.544   |
| QoL Social                      | 60                                   | -9.45                                               | -18.06, -0.83 | 0.032   | -5.02                                               | -13.11, 3.08  | 0.222   |
| QoL Family                      | 61                                   | 1.28                                                | -7.17, 9.73   | 0.765   | 1.36                                                | -6.62, 9.34   | 0.736   |
| QoL School                      | 61                                   | -8.53                                               | -17.59, 0.52  | 0.065   | -5.17                                               | -13.79, 3.44  | 0.237   |

<sup>1</sup> Positive treatment effect estimates favour Lamotrigine

**Table 8. Total, unadjusted costs by category of resource use.**

| Item of resource use     | Mean costs (97.5% CR) (£) |                      |                      |
|--------------------------|---------------------------|----------------------|----------------------|
|                          | Lamotrigine               | Levetiracetam        | Zonisamide           |
| Primary & community care | 682<br>(551, 1018)        | 1303<br>(981, 2009)  | 1013<br>(786, 1631)  |
| Primary care             | 332<br>(284, 423)         | 532<br>(416, 724)    | 411<br>(347, 567)    |
| Community care           | 350<br>(228, 646)         | 771<br>(489, 1381)   | 602<br>(374, 1117)   |
| Secondary care           | 3025<br>(2606, 3628)      | 3263<br>(2853, 3723) | 3882<br>(3140, 4670) |
| Admitted patient care    | 1170<br>(855, 1631)       | 1156<br>(869, 1443)  | 1663<br>(1153, 2246) |
| Outpatient               | 1519<br>(1393, 1664)      | 1705<br>(1552, 1876) | 1784<br>(1547, 2050) |
| Accident & emergency     | 336<br>(269, 425)         | 402<br>(314, 528)    | 434<br>(316, 582)    |
| Medicines                | 356<br>(294, 475)         | 508<br>(412, 665)    | 515<br>(423, 668)    |
| Anti-seizure medications | 125<br>(103, 158)         | 248<br>(213, 292)    | 269<br>(244, 298)    |
| Concomitant medications  | 231<br>(175, 348)         | 260<br>(172, 403)    | 246<br>(161, 390)    |
| Total                    | 4063<br>(3617, 4842)      | 5074<br>(4433, 6049) | 5409<br>(4584, 6658) |
