# Supplementary material for: The SANAD II study of the effectiveness and cost-effectiveness of levetiracetam, zonisamide, or lamotrigine for newly diagnosed focal epilepsy: an open-label, non-inferiority, multicentre, phase 4, randomised controlled trial
Source: PubMed Central journal article supplement (PMC8047799; doi:10.1016/s0140-6736(21)00247-6), 2021-04-10
Supplement: mmc4.pdf [file mmc4.pdf]

# THE LANCET

## Supplementary appendix

This appendix formed part of the original submission and has been peer reviewed. We post it as supplied by the authors.

Supplement to: Marson A, Burnside G, Appleton R, et al. The SANAD II study of the effectiveness and cost-effectiveness of levetiracetam, zonisamide, or lamotrigine for newly diagnosed focal epilepsy: an open-label, non-inferiority, multicentre, phase 4, randomised controlled trial. *Lancet* 2021; **397**: 1363–74.

## 1 Methods

### 2 Overview

3 The economic analysis was conducted from the perspective of the National Health Service (NHS) and  
4 Personal Social Services (PSS) in the UK. The primary economic analysis compared the costs and  
5 consequences of each antiepileptic drug over the first 24 months post randomisation. An analysis at  
6 an extended 48-month time horizon was planned for those participants followed up for 4 years or  
7 more.

8 The within-trial economic analysis was performed using individual, patient-level data from the  
9 SANAD-II trial. A cost-utility analysis was conducted to estimate incremental cost-effectiveness  
10 ratios, expressed as costs per quality-adjusted life years (QALY) gained.

11 The health economic analysis was carried out in Stata IC version 13 (StataCorp LLC, College Station,  
12 TX), and reported according to the CHEERS statement.<sup>1</sup>

### 13 Data sources

#### 14 *Resource-use*

15 Participants' use of resources was considered in four broad categories: i) resource-use associated  
16 with secondary care (inpatient, outpatient, accident and emergency), ii) other healthcare and social  
17 services resource-use (primary care, community services), iii) use of anti-seizure medication, and iv)  
18 use of other medications.

19 The measurement of resource-use was based on complementary approaches, using data collected as  
20 part of the trial, and as part of routine care. Resource-use postal questionnaires, completed by the  
21 parent or carer for participants under the age of 16, included a modified Client Service Receipt  
22 Inventory (CSRI) based on that from the SANAD trial.<sup>2-4</sup> This was used to collect information on  
23 participants' use of health service resources, personal social services and medicines. Questions  
24 pertained to contacts with health professionals at the GP surgery, in the hospital and in the  
25 community, the use of emergency services, and any tests or investigations which participants may  
26 have had. The questionnaires were initially administered at 3, 6, 12 months and annually thereafter  
27 (up to 60 months); however, from Protocol Version 7 onwards, this questionnaire was also provided  
28 during outpatient visits to aid completeness. Questionnaires completed following visits were  
29 matched to respective time points for analysis.

30 In all cases, participants were asked to report their primary and secondary care and social services  
31 resource-use for the 3-month period prior to completing the questionnaire, and to report their  
32 medicines use over a 4-week period prior to completing the questionnaire due to the additional  
33 complexity in the recall. The self-report questionnaires additionally contained free-text sections  
34 which allowed participants to record any resource-use which would not otherwise be captured by  
35 the questionnaire. During analysis these were assessed for duplication against those resources  
36 captured by the questionnaire, and any relevant, non-duplicated resources were extracted. Prior to  
37 Protocol Version 7 the questionnaire included additional questions relating to a broader  
38 perspective,<sup>5</sup> however these were removed in order to shorten the questionnaire, improve  
39 completion rates and to prioritise the NHS and PSS perspective, consistent with the NICE guidance  
40 for technology appraisal.<sup>6</sup>

41 Self-report data were therefore available for months 0-3, 3-6, 9-12, and 21-24. Self-reported  
42 resource-use for year 1 was estimated by multiplying the resource-use from months 9-12 by two,  
43 and adding the resource-use reported for months 0-3 and 3-6. Self-reported resource-use for year 2  
44 was estimated by multiplying resource-use for months 21-24 by four, and similarly for years 3, 4 and

45 5. Participants' use of concomitant medicines was multiplied by three (due to the shorter, 4-week  
46 recall period), before estimation following the same method.

47 Anti-seizure medications and their respective doses were recorded directly within case report forms.

48 Routine Hospital Episode Statistics (HES) were the primary source of data on participants' use of  
49 secondary care resources over the trial period. HES data were obtained from NHS Digital (for  
50 patients in England)<sup>7</sup> and, from the Secure Anonymised Information Linkage (SAIL) databank (for  
51 patients in Wales).<sup>8</sup> HES data were not obtained for patients in Scotland or Northern Ireland. HES  
52 provided Health Resource Group (HRG) data on the type of care patients receive at a ward level,  
53 outpatient visits and Accident and emergency admissions. HES data were used as the source for  
54 baseline resource-use and costs, based on the 6 months prior to randomisation. Adjustments were  
55 made where hospital episodes overlapped with randomisation date, in order to apportion the  
56 resource-use to the periods prior to, and subsequent to, randomisation.

57 All resource-use was measured irrespective of whether they were epilepsy related or otherwise.<sup>9</sup>

#### 58 *Unit costs*

59 Resource-use was valued in monetary terms (£ sterling) using sources of national unit costs.<sup>10-13</sup>

60 For data pertaining to participants from Wales an initial mapping step was performed using the  
61 Welsh NHS Data dictionary.<sup>14</sup> Subsequently, HRG codes were obtained from the HES data using the  
62 NHS Digital costing grouper.<sup>15</sup> Unit costs were allocated based on the latest available National  
63 Schedule.<sup>10</sup>

64 Unit costs for primary care and community care were taken from the compendium of Unit Costs of  
65 Health and Social Care.<sup>11</sup> Unit costs and their sources relating to items within the self-report  
66 questionnaire, are presented in Table 1. Unit costs relating to the most commonly reported HRGs  
67 are presented in Table 2.

68 Total costs for resource-use were calculated by multiplying the unit cost per item by the recorded  
69 number of times that each resource was used.

70 Table 1: Unit costs relating to self-reported resource use

| Item of resource                 | Unit cost (child) | Assumption                               | Source           |
|----------------------------------|-------------------|------------------------------------------|------------------|
| GP consultation at GP surgery    | £39               | 9.22 minutes                             | <sup>11</sup>    |
| Nurse consultation at GP surgery | £10.85            | 15.5 minutes                             | <sup>11,16</sup> |
| GP home visit                    | £99.45            | 11.4 minutes, 12 minutes travel          | <sup>11,16</sup> |
| Nurse home visit                 | £40               | N02AF                                    | <sup>10</sup>    |
| Dr at hospital                   | £185 (£203)       | Adult: Service 400<br>Child: Service 223 | <sup>10</sup>    |
| Nurse at hospital                | £29.19            | 15.5 minutes                             | <sup>11</sup>    |
| Hospital overnight               | £589              | Non-elective stay                        | <sup>10</sup>    |
| Ambulance                        | £257              | ASS02                                    | <sup>10</sup>    |
| A&E visit                        | £192.18           | (T01A, T01NA)*                           | <sup>10</sup>    |
| Blood test                       | £3                | DAPS05                                   | <sup>10</sup>    |
| Urine test                       | £2                | DAPS                                     | <sup>10</sup>    |
| Ultrasound                       | £54.82            | (RD40Z, RD41Z, RD42Z, RD43Z)*            | <sup>10</sup>    |

|                                     |                      |                                                  |    |
|-------------------------------------|----------------------|--------------------------------------------------|----|
| X-Ray                               | £31                  | DAPF                                             | 10 |
| CT scan                             | £88.53<br>(£99.74)   | Adult: (RD20A, RD21A)*<br>Child: (RD20B, RD21B)* | 10 |
| MRI scan                            | £138.24<br>(£141.87) | Adult: (RD01A, RD02A)*<br>Child: (RD01B, RD02B)* | 10 |
| EEG                                 | £199<br>(£340)       | Adult: AA33C<br>Child: AA33D                     | 10 |
| Health visitor                      | £72                  | N03G                                             | 10 |
| Social worker                       | £50<br>(£51)         | 1-hour visit                                     | 11 |
| Occupational therapist              | £83<br>(£141)        | Adult: A06A1<br>Child: A06C1                     | 10 |
| Psychologist                        | £199                 | Service 656                                      | 10 |
| Counsellor                          | £45<br>(£94)         | 1-hour visit                                     | 11 |
| Physiotherapist                     | £63<br>(£101)        | Adult: A08A1<br>Child: A08C1                     | 10 |
| Resources identified from free text |                      |                                                  |    |
| Telephone consultation (GP)         | £15.52               |                                                  | 11 |
| GP out of hours                     | £72.97               | Inflated to 2018/19                              | 17 |
| MMR                                 | £7.64                | In addition to nurse appointment                 | 12 |
| Pharmacist                          | £11                  | Band 6, 15 mins                                  | 11 |
| Repeat prescription                 | £7.30                |                                                  | 11 |
| Stool test                          | £2                   | DAPS                                             | 10 |
| MRSA swab / Saliva test             | £8                   | DAPS07                                           | 10 |
| Psychiatrist                        | £226<br>(£227)       | Adult: Service 713<br>Child: Service 711         | 10 |
| Support worker                      | £24                  |                                                  | 11 |
| Speech therapist                    | £107<br>(£100)       | Adult: A13A1<br>Child: A13C1                     | 10 |
| Dietitian                           | £90                  | A03                                              | 10 |
| Podiatrist                          | £43                  | A09A                                             | 10 |
| Podiatrist minor surgery            | £86                  | A09B                                             | 10 |
| Midwife                             | £58                  | N01A                                             | 10 |
| Hearing test                        | £101<br>(£89)        | Adult: CA37A<br>Child: CA37B                     | 10 |
| Optician                            | £76                  | Service 662                                      | 10 |
| NHS glasses                         | £39.10               | Voucher A                                        | 18 |
| Dentist                             | £98                  | M01B                                             | 10 |
| Orthodontist                        | £121<br>(£221)       | Service 143<br>CAMHSCC                           | 10 |
| CAMHS                               | (£68)                | N05CO                                            | 10 |
| School nurse / SENCO                |                      |                                                  | 10 |
| Mammogram                           | £57.37               | Inflated to 2018/19                              | 19 |
| Cervical smear                      | £39.76               | Inflated to 2018/19                              | 20 |
| NHS Direct                          | £13.02               | Inflated to 2018/19                              | 21 |
| Anticoagulant Service               | £37                  | Service 324                                      | 10 |
| Radiofrequency for pain management  | £699                 | AB15Z                                            | 10 |
| Radiotherapy                        | £182                 | SC31Z                                            | 10 |
| ECG                                 | £72.57               | Adult: RD51A                                     | 10 |

|                                                 |                |                              |    |
|-------------------------------------------------|----------------|------------------------------|----|
|                                                 | (£53.58)       | Child: RD51B                 |    |
| Video telemetry / Long term EEG monitoring      | £491           | AA81Z                        | 10 |
| Cerebral angiogram/ Contrast fluoroscopy        | £170           | RD31Z                        | 10 |
| Spinal fluid test                               | £617<br>(£882) | Adult: HC72A<br>Child: HC72B | 10 |
| Cystoscopy                                      | £250<br>(£849) | Adult: LB72A<br>Child: LB72B | 10 |
| Colonoscopy                                     | £520           | FE32Z                        | 10 |
| Sigmoidoscopy                                   | £386           | FE35Z                        | 10 |
| Endoscopy                                       | £454           | FE22Z                        | 10 |
| Dexa scan                                       | £71.92         | RD50Z                        | 10 |
| PET scan                                        | £506<br>(£389) | Adult: RN01A<br>Child: RN01B | 10 |
| Peak flow test                                  | £152           | DZ45Z                        | 10 |
| Field Exercise Test                             | £55            | DZ32Z                        | 10 |
| Cataract operation                              | £915           | BZ34C                        | 10 |
| Orthotics                                       | £124           | Service 658                  | 10 |
| Intermediate sinus procedures                   | £2344          | CA28Z                        | 10 |
| Insertion of grommets                           | £998           | CA35B                        | 10 |
| Arm fracture & CC                               | £1417          | HE51G                        | 10 |
| Rib fracture                                    | £1025          | HE71D                        | 10 |
| Hand fracture                                   | £384           | HE41D                        | 10 |
| Minor dental procedures <19                     | £153           | CD03B                        | 10 |
| Tooth extraction 18 & under                     | £491           | CD07B                        | 10 |
| Minor skin procedures                           | £215<br>(£288) | Adult: JC43C<br>Child: JC43D | 10 |
| Diabetic retinopathy screen                     | £108           | BZ88A                        | 10 |
| Nasal polypectomy                               | £1715          | CA14Z                        | 10 |
| Skin biopsy external nose                       | £461           | CA16Z                        | 10 |
| Percutaneous biopsy                             | £1491          | YH32A                        | 10 |
| Liver biopsy                                    | £671           | YG11A                        | 10 |
| Biopsy of prostate                              | £504           | LB76Z                        | 10 |
| Sleep apnoea test                               | £309           | DZ50Z                        | 10 |
| Pelvis fracture (hip fracture)                  | £2117          | HE11H                        | 10 |
| Vaginal tape operation for urinary incontinence | £2020          | LB51B                        | 10 |
| Minor foot operation                            | £832<br>(£580) | Adult: HN35A<br>Child: HN35B | 10 |
| Hernia repair                                   | £2651          | FF60D                        | 10 |
| Hysterectomy                                    | £3515          | MA08B                        | 10 |
| Triple heart bypass                             | £10199         | ED28B                        | 10 |
| Hip replacement                                 | £6057          | HN12F                        | 10 |
| Pacemaker fitted                                | £1085          | EY08E                        | 10 |
| Implantation of loop recorder                   | £1270          | EY12B                        | 10 |
| Removal of loop recorder                        | £693           | EY13Z                        | 10 |
| Cholecystectomy (gall bladder removal)          | £2861          | GA10K                        | 10 |
| Knee replacement                                | £5699          | HN22E                        | 10 |
| Reconstructive surgery (chest clinic)           | £5706          | JA30Z                        | 10 |

|                            |        |                                              |    |
|----------------------------|--------|----------------------------------------------|----|
| Cardiac catheterisation    | £1142  | EY43F                                        | 10 |
| Walk in centre visit       | £72.07 | (T02A, T02NA, T03A,<br>T03NA, T04A & T04NA)* | 10 |
| See & treat (no convey)    | £209   | ASS01                                        | 10 |
| *Weighted average of codes |        |                                              |    |

71

72

Table 2 Unit costs relating to the most commonly reported HRGs at baseline and at 24-month time horizon

| <b>Admitted patient care</b>    |                                                                                                      |                 |                                                 |                     |                  |  |
|---------------------------------|------------------------------------------------------------------------------------------------------|-----------------|-------------------------------------------------|---------------------|------------------|--|
| <b>HRG code</b>                 | <b>Description</b>                                                                                   | <b>Elective</b> | <b>NEL</b>                                      | <b>NES</b>          | <b>Day case</b>  |  |
| AA26G                           | Muscular, Balance, Cranial or Peripheral Nerve Disorders, Epilepsy or Head Injury, with CC Score 3-5 | £3051           | £1924                                           | £416                | £549             |  |
| AA26H                           | Muscular, Balance, Cranial or Peripheral Nerve Disorders, Epilepsy or Head Injury, with CC Score 0-2 | £2358           | £1713                                           | £357                | £595             |  |
| AA33C                           | Conventional EEG, EMG or Nerve Conduction Studies, 19 years and over                                 | £1952           | £2993                                           | £827                | £807             |  |
| AA80Z                           | Complex Long-Term EEG Monitoring                                                                     | £2126           | £2960                                           | £1182               | £901             |  |
| PR02B                           | Paediatric Epilepsy Syndrome with CC Score 1-5                                                       | £2835           | £3242                                           | £602                | £998             |  |
| PR02C                           | Paediatric Epilepsy Syndrome with CC Score 0                                                         | £1800           | £2741                                           | £564                | £742             |  |
| SB97Z                           | Same Day Chemotherapy Admission or Attendance                                                        | £308            | £3014                                           | £382                | £110             |  |
| SC97Z                           | Same Day Radiotherapy Admission or Attendance (excluding Brachytherapy)                              | £972            | -                                               | £287                | £1389            |  |
| WH04E                           | Poisoning Diagnosis without Interventions, with CC Score 0-1                                         | £1176           | £1347                                           | £383                | £362             |  |
| WH50B                           | Procedure Not Carried Out, for Other or Unspecified Reasons                                          | £578            | £1995                                           | £477                | £330             |  |
| <b>Outpatients</b>              |                                                                                                      |                 |                                                 |                     |                  |  |
| <b>Service</b>                  |                                                                                                      | <b>Currency</b> |                                                 | <b>Consultation</b> | <b>Procedure</b> |  |
| 110                             | Trauma & Orthopaedics                                                                                | WF01A           | Non-Admitted Face-to-Face Attendance, Follow-up | £120                | £245             |  |
| 110                             | Trauma & Orthopaedics                                                                                | N/A             | N/A                                             | £120                | N/A              |  |
| 223                             | Paediatric epilepsy                                                                                  | N/A             | N/A                                             | £203                | N/A              |  |
| 320                             | Cardiology                                                                                           | WF01A           | Non-Admitted Face-to-Face Attendance, Follow-up | £139                | £193             |  |
| 400                             | Neurology                                                                                            | WF01A           | Non-Admitted Face-to-Face Attendance, Follow-up | £177                | £697             |  |
| 400                             | Neurology                                                                                            | WF01B           | Non-Admitted Face-to-Face Attendance, First     | £177                | £410             |  |
| 400                             | Neurology                                                                                            | N/A             | N/A                                             | £177                | N/A              |  |
| 420                             | Paediatrics                                                                                          | WF01A           | Non-Admitted Face-to-Face Attendance, Follow-up | £217                | £889             |  |
| 421                             | Paediatric neurology                                                                                 | WF01A           | Non-Admitted Face-to-Face Attendance, Follow-up | £339                | £1099            |  |
| 650                             | Physiotherapy                                                                                        | WF01A           | Non-Admitted Face-to-Face Attendance, Follow-up | £58                 | £80              |  |
| <b>Accident &amp; emergency</b> |                                                                                                      |                 |                                                 |                     |                  |  |
| <b>Service</b>                  |                                                                                                      | <b>Currency</b> |                                                 |                     |                  |  |

|       |                      |       |                                                                          |      |
|-------|----------------------|-------|--------------------------------------------------------------------------|------|
| N/A   | N/A                  | ASS02 | See and treat and convey                                                 | £257 |
| T01A  | Type 01 admitted     | VB04Z | Emergency Medicine, Category 2 Investigation with Category 4 Treatment   | £318 |
| T01A  | Type 01 admitted     | VB08Z | Emergency Medicine, Category 2 Investigation with Category 1 Treatment   | £220 |
| T01A  | Type 01 admitted     | VB09Z | Emergency Medicine, Category 1 Investigation with Category 1-2 Treatment | £159 |
| T01NA | Type 01 non admitted | VB07Z | Emergency Medicine, Category 2 Investigation with Category 2 Treatment   | £200 |
| T01NA | Type 01 non admitted | VB08Z | Emergency Medicine, Category 2 Investigation with Category 1 Treatment   | £179 |
| T01NA | Type 01 non admitted | VB09Z | Emergency Medicine, Category 1 Investigation with Category 1-2 Treatment | £133 |
| T01NA | Type 01 non admitted | VB11Z | Emergency Medicine, No Investigation with No Significant Treatment       | £114 |
| T03NA | Type 03 non admitted | VB09Z | Emergency Medicine, Category 1 Investigation with Category 1-2 Treatment | £68  |
| T04NA | Type 04 non admitted | VB09Z | Emergency Medicine, Category 1 Investigation with Category 1-2 Treatment | £53  |

NEL: Non-elective long-stay; NES: Non-elective short-stay



1 Table 3: Unit costs relating to trial anti-seizure medicines

| ASD           | Formulation               | Strength | N / vol | Unit cost (£) |
|---------------|---------------------------|----------|---------|---------------|
| Lamotrigine   |                           |          |         |               |
|               | Dispersible tablet        | 2mg      | 30      | 18.81         |
|               | Dispersible tablet        | 5mg      | 28      | 7.67          |
|               | Dispersible tablet        | 25mg     | 56      | 4.70          |
|               | Dispersible tablet        | 100mg    | 56      | 6.29          |
|               | Tablet                    | 25mg     | 56      | 1.89          |
|               | Tablet                    | 50mg     | 56      | 2.46          |
|               | Tablet                    | 100mg    | 56      | 3.48          |
|               | Tablet                    | 200mg    | 56      | 4.37          |
| Levetiracetam |                           |          |         |               |
|               | Tablet                    | 250mg    | 60      | 5.72          |
|               | Tablet                    | 500mg    | 60      | 9.97          |
|               | Tablet                    | 750mg    | 60      | 8.96          |
|               | Tablet                    | 1g       | 60      | 14.97         |
|               | Oral solution, sugar free | 100mg/ml | 300     | 7.71          |
| Zonisamide    |                           |          |         |               |
|               | Capsule                   | 25mg     | 14      | 7.55          |
|               | Capsule                   | 50mg     | 56      | 40.01         |
|               | Capsule                   | 100mg    | 56      | 5.27          |

2

3 Medication costs were taken from the British National Formulary (BNF) using drug tariff prices  
 4 where available,<sup>12</sup> else the NHS indicative price, and the Prescription Costs Analysis (PCA) for  
 5 England.<sup>13</sup> Unit costs for trial anti-seizure medications are presented in Table 3. Unless otherwise  
 6 specified in the data, children aged 9 and over were assumed to be prescribed tablets or capsules,  
 7 whilst children aged 8 and under were assumed to be prescribed an alternative form (e.g. solution,  
 8 dispersible) where available.

9 The cost of each medicine was calculated by calculating the price per dose and multiplying by the  
 10 quantity prescribed (e.g. number of tablets, capsules, inhalers or prefilled syringes), and the number  
 11 of days of treatment.

12 All costs are at 2019/2020 prices and were discounted in the base-case analysis at the NICE  
 13 recommended rate of 3.5% per annum.<sup>6</sup>

14

### 15 *Health Utilities*

16 The primary health outcome measure for the economic analysis was the quality-adjusted life year  
 17 (QALY), generated from utility data measured using the EuroQol 5-dimension 3-level (EQ-5D-3L)  
 18 questionnaire.<sup>22</sup> Secondary economic outcome measures were the EQ-VAS, and an epilepsy-specific  
 19 utility measure, the NEWQOL-6D.<sup>23</sup>

20 The EQ-5D descriptive system includes five dimensions, relating to mobility, self-care, usual  
 21 activities, pain and discomfort, and anxiety. For the EQ-5D-3L and EQ-5D-3L-Y, each dimension is  
 22 measured against 3 statements (no problems, some problems and extreme problems), scored 1, 2

23 and 3, respectively. The NEWQOL-6D is an epilepsy-specific measure that includes domains of worry,  
24 depression, memory, concentration, control and stigma. Responses are measured according to 4  
25 categories. Utility scores are obtained from the EQ-5D-3L-Y, EQ-5D-3L, EQ-5D-3L proxy and  
26 NEWQOL-6D using UK tariff values.<sup>23,24</sup>

27 For participants aged 8 to 15, self-reported responses to the EQ-5D-3L-Y were used, or if not  
28 available, proxy questionnaire responses (EQ-5D-3L and NEWQOL-6D), completed by a parent or  
29 carer. For participants aged 5-7 years, only proxy questionnaires were administered. All participants  
30 aged 8 years or over were administered the EQ-VAS.

31 All economic outcome measures were completed during the baseline visit, and annually thereafter  
32 (up to 60 months), and from Protocol version 7 onwards, were also provided during outpatient visits  
33 to aid completeness. Utility scores at 365 days (12 months) and at 730 days (24 months) were  
34 interpolated, based on recorded utility scores and actual dates of questionnaire completion. QALY  
35 profiles were derived from these utilities, estimated based on the area under the curve (AUC)  
36 assuming the trapezoidal rule using all available data. QALYs derived from the secondary health  
37 economic outcomes (EQ-VAS and NEWQOL-6D) were estimated in the same way, based on AUC.

38 All QALYs were discounted at the NICE recommended rate of 3.5% per annum.<sup>6</sup>

39

#### 40 Data analysis

41 Analysis consisted of all randomised participants, which is consistent with the intention to treat  
42 approach. All statistical tests were two-sided, with confidence intervals (CIs) and central ranges (CRs)  
43 reported at 97.5%.

44 Costs relating to secondary care were primarily sourced from HES data, but where these data were  
45 not available, costs were supplemented with resource-use recorded in the self-report  
46 questionnaires. Primary and community care costs and concomitant medication costs were also  
47 taken from the resource-use questionnaires. Where resource-use questionnaires were returned, but  
48 no response was provided for a given resource, then use of that resource was assumed to be zero.  
49 Where participants indicated that they had used a resource but had not given a number for how  
50 many times the resource was used, then the number was assumed to be one. Data relating to anti-  
51 seizure medications were taken from the baseline and follow-up CRFs. Missing dose data were  
52 assigned according to previous or subsequent prescriptions, based on questions relating to dose  
53 changes, and where these were unavailable, from the BNF recommended doses.

54 Data were examined for missingness, and appropriate methods were applied dependent on the level  
55 of missingness and likely mechanism of missingness.<sup>25</sup> Missing cost and QALY data were imputed  
56 using multiple imputation with chained equations.<sup>26</sup> When the mechanism of data missingness is not  
57 missing completely at random, complete case analysis can lead to serious bias which can reverse  
58 decisions of cost-effectiveness.<sup>25</sup> Multiple imputation is a flexible approach which provides unbiased  
59 results when data are missing at random.<sup>25,26</sup>

60 In order to maximise data use, data were imputed at the level of utility scores (EQ-5D, EQ-VAS) at  
61 baseline, 12 months and 24 months; primary care, community care and concomitant medications  
62 costs at 3 months, 6 months, 12 months and 24 months; admitted patient care, outpatients,  
63 accident and emergency and anti-seizure medication costs) at 12 months and 24 months. Baseline  
64 costs (relating to admitted patient care, outpatients, accident and emergency) were also imputed for  
65 those participants where HES data were not available. Imputation models were generated using

66 predictive mean matching, and data were imputed by randomised treatment group. Variables  
67 pertaining to epilepsy classification, seizure type, age, gender, primary outcome and treatment  
68 failure were included within the imputation models. Imputation models for baseline measures  
69 omitted post-baseline outcomes in order to preserve randomisation. The number of imputations  
70 required was based on the level of missingness, according to the fraction of missing information  
71 (FMI).<sup>27</sup>

72 Based on the imputed data, total costs and QALYs during the course of the trial were calculated, with  
73 summary statistics generated by randomised treatment group. Differences between treatment  
74 groups were compared with reference to bootstrapped central ranges, based on 10,000 replications.

75 Total costs and QALYs (at 24 months) were adjusted for any imbalances in baseline costs and utilities  
76 respectively, and clinical or demographic variables (age, sex, epilepsy classification, with centre as  
77 random effects), using ordinary least squares (OLS) regressions.<sup>28,29</sup> OLS was considered to be  
78 appropriate given the large sample size.<sup>29</sup>

#### 79 Incremental analysis

80 Interventions were ranked according to their effectiveness (from highest to lowest QALYs), and  
81 dominance and extended dominance were determined. The incremental cost effectiveness ratio  
82 (ICER) was calculated for non-dominated interventions, as:

83  $ICER = (\text{Difference in costs}) / (\text{difference in QALY})$

84 Net health benefits (NHB), and incremental net health benefits (INHB) were also calculated at the  
85 £20,000 per QALY and £30,000 per QALY thresholds, according to the following formulae:

86  $NHB = (\text{QALYs}) - \lambda \cdot (\text{Costs})$

87  $INHB = (\text{Difference in QALYs}) - \lambda \cdot (\text{Difference in costs})$

88 Where  $\lambda$  is the cost-effectiveness threshold.<sup>30</sup>

89 The base-case was defined as being from the perspective of the NHS and PSS, adopting a 2-year time  
90 horizon, and based on the imputed data set of the intention to treat population, with adjusted costs  
91 and QALYs.

#### 92 Sensitivity analysis

93 Several sensitivity analyses were conducted to assess the robustness of the base-case results to key  
94 assumptions. These were:

- 95 1) using discount rates of 0% and 6% per annum for costs and QALYs;
- 96 2) an unadjusted analysis (i.e. based on mean costs and QALYs, with no regression);
- 97 3) using results for complete case cost and QALY data (i.e. those without missing data) to  
98 identify the impact of missing data and imputation;
- 99 4) based on the population as the per protocol cohort; and
- 100 5) using QALYs derived from the NEWQOL-6D and EQ-VAS
- 101 6) treating blank values in resource use questionnaires as missing, rather than zero.

102 A bootstrap analysis was conducted to consider the joint uncertainty in incremental costs and  
103 QALYs. This was represented as a cost-effectiveness plane, and as a cost-effectiveness acceptability  
104 curve (CEAC) illustrating the probability of each treatment being cost effective for a given cost-  
105 effectiveness threshold.<sup>31</sup>

106

## 107 Subgroup analysis

108 Subgroup analyses were conducted to investigate how cost-effectiveness varied by age, according to  
109 whether participants were adults (aged 16 and over) or children (aged under 16).

110

## 111 Results:

112 HES data were available for a total of 772 participants, relating to 266 participants randomised to  
113 lamotrigine, 261 participants in the levetiracetam treatment group and 245 participants randomised  
114 to zonisamide. A breakdown of missing data by treatment group and outcome is provided in Table 4.

115 Seven-hundred and eighty-nine participants completed at least one self-report questionnaire  
116 (completing either resource use, EQ-5D, or both sections); 621 completed two questionnaires or  
117 more. In total, questionnaires were available for 3039 participant-time points (once child and proxy  
118 questionnaires had been resolved).

119 Questionnaires returned after the change in protocol were assigned to their nearest time-point for  
120 presentation purposes. Self-report resource use data were available for 550 participants at 3  
121 months, 527 at 6 months, 465 at 12 months and 398 at 24 months. Resource use data were also  
122 available from 496 questionnaires returned at the later time points (36 months, 48 months, 60  
123 months).

124 Utility data (EQ-5D) were available for 616 participants at baseline, data were interpolated to 12  
125 months for 422 participants and for 319 participants at 24 months. These are lower than the figures  
126 reported in Table 4 due to 12- and 24-month questionnaires being dated less than 365 and 730 days  
127 post randomisation, respectively. For the NEWQOL-6D, less utility data were available due to a high  
128 level of partially completed questionnaires.

129 A total of 50 data sets were imputed, based on the largest FMI (0.7) and accepting <1% reduction in  
130 power compared with 100 imputations. For the bootstrapped results, this was reduced to 10 for  
131 efficiency purposes, accepting a higher reduction in power in order to achieve an acceptable  
132 computation time.<sup>27</sup> Due to the level of missingness, models containing the NEWQOL-6D were non-  
133 convergent, hence only complete case results are presented for the NEWQOL-6D.

Table 4: Summary of data completeness by outcome, time point and treatment group

| Variable                | Time point | Lamotrigine      |            |       | Levetiracetam |            |       | Zonisamide |            |       |
|-------------------------|------------|------------------|------------|-------|---------------|------------|-------|------------|------------|-------|
|                         |            | Complete         | Incomplete | Total | Complete      | Incomplete | Total | Complete   | Incomplete | Total |
| Costs                   |            | Participants (n) |            |       |               |            |       |            |            |       |
| Admitted patient care   | Baseline   | 266              | 64         | 330   | 261           | 71         | 332   | 245        | 83         | 328   |
| Outpatients             | Baseline   | 266              | 64         | 330   | 261           | 71         | 332   | 245        | 83         | 328   |
| Accident & emergency    | Baseline   | 266              | 64         | 330   | 261           | 71         | 332   | 245        | 83         | 328   |
| Primary care            | 3 months   | 182              | 148        | 330   | 186           | 146        | 332   | 182        | 146        | 328   |
| Community care          | 3 months   | 182              | 148        | 330   | 186           | 146        | 332   | 182        | 146        | 328   |
| Concomitant medication  | 3 months   | 182              | 148        | 330   | 186           | 146        | 332   | 182        | 146        | 328   |
| Primary care            | 6 months   | 177              | 153        | 330   | 176           | 156        | 332   | 174        | 154        | 328   |
| Community care          | 6 months   | 177              | 153        | 330   | 176           | 156        | 332   | 174        | 154        | 328   |
| Concomitant medication  | 6 months   | 177              | 153        | 330   | 176           | 156        | 332   | 174        | 154        | 328   |
| Primary care            | 12 months  | 156              | 174        | 330   | 154           | 178        | 332   | 155        | 173        | 328   |
| Community care          | 12 months  | 156              | 174        | 330   | 154           | 178        | 332   | 155        | 173        | 328   |
| Admitted patient care   | 12 months  | 298              | 34         | 330   | 286           | 47         | 332   | 272        | 56         | 328   |
| Outpatients             | 12 months  | 298              | 34         | 330   | 286           | 47         | 332   | 272        | 56         | 328   |
| Accident & emergency    | 12 months  | 298              | 34         | 330   | 286           | 47         | 332   | 272        | 56         | 328   |
| Anti-seizure medication | 12 months  | 291              | 39         | 330   | 293           | 39         | 332   | 280        | 48         | 328   |
| Concomitant medication  | 12 months  | 156              | 174        | 330   | 154           | 178        | 332   | 155        | 173        | 328   |
| Primary care            | 24 months  | 135              | 195        | 330   | 133           | 199        | 332   | 130        | 198        | 328   |
| Community care          | 24 months  | 135              | 195        | 330   | 133           | 199        | 332   | 130        | 198        | 328   |
| Admitted patient care   | 24 months  | 299              | 32         | 330   | 291           | 43         | 332   | 280        | 48         | 328   |
| Outpatients             | 24 months  | 299              | 32         | 330   | 291           | 43         | 332   | 280        | 48         | 328   |
| Accident & emergency    | 24 months  | 299              | 32         | 330   | 291           | 43         | 332   | 280        | 48         | 328   |
| Anti-seizure medication | 24 months  | 257              | 73         | 330   | 260           | 72         | 332   | 239        | 89         | 328   |
| Concomitant medication  | 24 months  | 135              | 195        | 330   | 133           | 199        | 332   | 130        | 198        | 328   |
| Primary care            | 36 months  | 93               | 175        | 268   | 92            | 174        | 266   | 84         | 183        | 267   |
| Community care          | 36 months  | 93               | 175        | 268   | 92            | 174        | 266   | 84         | 183        | 267   |
| Admitted patient care   | 36 months  | 236              | 32         | 268   | 225           | 41         | 266   | 217        | 50         | 267   |
| Outpatients             | 36 months  | 236              | 32         | 268   | 225           | 41         | 266   | 217        | 50         | 267   |
| Accident & emergency    | 36 months  | 236              | 32         | 268   | 225           | 41         | 266   | 217        | 50         | 267   |

|                         |           |     |     |     |     |     |     |     |     |     |
|-------------------------|-----------|-----|-----|-----|-----|-----|-----|-----|-----|-----|
| Anti-seizure medication | 36 months | 125 | 143 | 268 | 134 | 132 | 266 | 118 | 149 | 267 |
| Concomitant medication  | 36 months | 93  | 175 | 268 | 92  | 174 | 266 | 84  | 183 | 267 |
| Primary care            | 48 months | 46  | 125 | 171 | 58  | 117 | 175 | 44  | 130 | 174 |
| Community care          | 48 months | 46  | 125 | 171 | 58  | 117 | 175 | 44  | 130 | 174 |
| Admitted patient care   | 48 months | 150 | 21  | 171 | 151 | 24  | 175 | 141 | 33  | 174 |
| Outpatients             | 48 months | 150 | 21  | 171 | 151 | 24  | 175 | 141 | 33  | 174 |
| Accident & emergency    | 48 months | 150 | 21  | 171 | 151 | 24  | 175 | 141 | 33  | 174 |
| Anti-seizure medication | 48 months | 62  | 109 | 171 | 66  | 109 | 175 | 52  | 122 | 174 |
| Concomitant medication  | 48 months | 46  | 125 | 171 | 58  | 117 | 175 | 44  | 130 | 174 |
| Primary care            | 60 months | 26  | 54  | 80  | 29  | 50  | 79  | 24  | 53  | 77  |
| Community care          | 60 months | 26  | 54  | 80  | 29  | 50  | 79  | 24  | 53  | 77  |
| Admitted patient care   | 60 months | 74  | 6   | 80  | 69  | 10  | 79  | 59  | 18  | 77  |
| Outpatients             | 60 months | 74  | 6   | 80  | 69  | 10  | 79  | 59  | 18  | 77  |
| Accident & emergency    | 60 months | 74  | 6   | 80  | 69  | 10  | 79  | 59  | 18  | 77  |
| Anti-seizure medication | 60 months | 19  | 61  | 80  | 22  | 57  | 80  | 16  | 61  | 80  |
| Concomitant medication  | 60 months | 26  | 54  | 80  | 29  | 50  | 79  | 24  | 53  | 77  |
| Utilities               |           |     |     |     |     |     |     |     |     |     |
| EQ-5D                   | Baseline  | 209 | 121 | 330 | 202 | 130 | 332 | 205 | 123 | 328 |
| NEWQOL-6D               | Baseline  | 201 | 129 | 330 | 190 | 142 | 332 | 186 | 142 | 328 |
| EQ-VAS                  | Baseline  | 188 | 142 | 330 | 187 | 145 | 332 | 190 | 138 | 328 |
| EQ-5D                   | 12 months | 148 | 182 | 330 | 148 | 184 | 332 | 147 | 181 | 328 |
| NEWQOL-6D               | 12 months | 107 | 223 | 330 | 100 | 232 | 332 | 104 | 224 | 328 |
| EQ-VAS                  | 12 months | 135 | 194 | 330 | 126 | 206 | 332 | 136 | 192 | 328 |
| EQ-5D                   | 24 months | 121 | 209 | 330 | 124 | 208 | 332 | 122 | 206 | 328 |
| NEWQOL-6D               | 24 months | 87  | 243 | 330 | 88  | 244 | 332 | 80  | 248 | 328 |
| EQ-VAS                  | 24 months | 116 | 214 | 330 | 111 | 221 | 332 | 114 | 214 | 328 |
| EQ-5D                   | 36 months | 94  | 174 | 268 | 93  | 173 | 266 | 83  | 184 | 267 |
| NEWQOL-6D               | 36 months | 69  | 199 | 268 | 58  | 208 | 266 | 61  | 206 | 267 |
| EQ-VAS                  | 36 months | 93  | 175 | 268 | 89  | 177 | 266 | 78  | 189 | 267 |
| EQ-5D                   | 48 months | 50  | 121 | 171 | 58  | 117 | 175 | 46  | 128 | 174 |
| NEWQOL-6D               | 48 months | 37  | 134 | 171 | 41  | 134 | 175 | 33  | 141 | 174 |
| EQ-VAS                  | 48 months | 48  | 123 | 171 | 55  | 120 | 175 | 43  | 131 | 174 |
| EQ-5D                   | 60 months | 31  | 49  | 80  | 31  | 48  | 79  | 26  | 51  | 77  |

|           |           |    |    |    |    |    |    |    |    |    |
|-----------|-----------|----|----|----|----|----|----|----|----|----|
| NEWQOL-6D | 60 months | 25 | 55 | 80 | 16 | 63 | 79 | 17 | 60 | 77 |
| EQ-VAS    | 60 months | 31 | 49 | 80 | 30 | 49 | 79 | 25 | 52 | 77 |

---

### *Resource use and costs*

Table 5 presents observed mean disaggregated resource-use based on the self-report questionnaires. Table 6 presents the most common admitted patient care episodes, outpatient and accident and emergency related HRGs and costs observed during the trial period. During the 24-month follow-up period, 339 unique HRGs were recorded in admitted patient care, 262 in outpatients, and 35 in accident & emergency.

Based on the imputed data, the majority of costs related to secondary care, in particular admitted patient care and outpatient clinic attendance (Table 7). Comparing across treatment groups, participants randomised to zonisamide had higher secondary care costs compared with lamotrigine and levetiracetam. Total (unadjusted) costs for participants randomised to zonisamide were £5409 (97.5% CR £4584, £6658), compared with levetiracetam £5074 (97.5% CR £4433, £6049), and lamotrigine £4063 (97.5% CR £3617, £4842). The differences between zonisamide and levetiracetam £336 (97.5% CR -£926, £1634), and between levetiracetam and lamotrigine £1011 (97.5% CR -£36, £2066), were not statistically significant. However, the incremental cost of zonisamide versus lamotrigine of £1347 (97.5% CR £266, £2550) was significant.

Based on imputed data, baseline costs were £1,215 (97.5% CR £1061, £1375) for zonisamide, £1,191 (97.5% CR £1035, £1398) for levetiracetam, and £1,239 (97.5% CR £1036, £1464) for lamotrigine. The base-case analysis which adjusted for baseline costs, age, gender and epilepsy type with centre as random-effects yielded a 2-year total cost of £5400 (97.5% CR £4659, £6770) for zonisamide, compared with £5104 (97.5% CR £4450, £6141) for levetiracetam, and £4042 (97.5% CR £3626, £4983) for lamotrigine. The differences between zonisamide and levetiracetam £297 (97.5% CR -£388, £1550), was not statistically significant. There were significant differences between levetiracetam and lamotrigine £1,062 (97.5% CR £1174, £2133), and between zonisamide and lamotrigine £1,358 (97.5% CR £376, £2563).



Table 5: Observed resource-use based on self-report questionnaire (24-month time horizon)

| Time point                  |                                  | Mean [range] (n participants) |                  |                  |                  |                  |                  |                  |                  |                 |                  |                  |                  |
|-----------------------------|----------------------------------|-------------------------------|------------------|------------------|------------------|------------------|------------------|------------------|------------------|-----------------|------------------|------------------|------------------|
|                             |                                  | 3 months                      |                  |                  | 6 months         |                  |                  | 12 months        |                  |                 | 24 months        |                  |                  |
| Questionnaires returned (n) |                                  | 179                           | 183              | 182              | 172              | 170              | 173              | 150              | 147              | 151             | 126              | 124              | 122              |
| Resource                    | Treatment group                  | LTG                           | LEV              | ZON              | LTG              | LEV              | ZON              | LTG              | LEV              | ZON             | LTG              | LEV              | ZON              |
| Primary care                |                                  |                               |                  |                  |                  |                  |                  |                  |                  |                 |                  |                  |                  |
|                             | GP consultation at GP surgery    | 1.02 [0-8] (90)               | 1.13 [0-13] (88) | 0.98 [0-10] (92) | 0.67 [0-5] (63)  | 0.87 [0-10] (72) | 0.89 [0-12] (71) | 0.76 [0-14] (65) | 1.01 [0-12] (67) | 1.10 [0-8] (76) | 0.83 [0-9] (52)  | 1.09 [0-10] (56) | 1.01 [0-20] (52) |
|                             | Nurse consultation at GP surgery | 0.58 [0-11] (46)              | 0.50 [0-10] (42) | 0.46 [0-10] (47) | 0.42 [0-12] (45) | 0.38 [0-6] (35)  | 0.56 [0-24] (42) | 0.63 [0-12] (48) | 0.71 [0-10] (51) | 0.73 [0-8] (52) | 0.83 [0-12] (51) | 0.85 [0-8] (47)  | 0.74 [0-16] (41) |
|                             | GP home visit                    | 0.01 [0-1] (1)                | 0.04 [0-6] (3)   | 0.05 [0-5] (5)   | 0.02 [0-2] (2)   | 0.04 [0-2] (5)   | 0.02 [0-2] (3)   | 0                | 0.02 [0-2] (2)   | 0.01 [0-1] (1)  | 0.02 [0-2] (1)   | 0.08 [0-6] (3)   | 0.02 [0-1] (3)   |
|                             | Nurse home visit                 | 0.10 [0-2] (14)               | 0.13 [0-6] (10)  | 0.05 [0-6] (4)   | 0.03 [0-1] (5)   | 0.37 [0-24] (11) | 0.05 [0-12] (9)  | 0.01 [0-1] (1)   | 0.68 [0-95] (5)  | 0.01 [0-1] (1)  | 0.01 [0-1] (1)   | 0.19 [0-12] (10) | 0.05 [0-2] (4)   |
| Community care              |                                  |                               |                  |                  |                  |                  |                  |                  |                  |                 |                  |                  |                  |
|                             | Health visitor                   | 0.01 [0-1] (2)                | 0.06 [0-6] (4)   | 0.04 [0-3] (4)   | 0.01 [0-1] (1)   | 0.06 [0-5] (3)   | 0.02 [0-3] (1)   | 0.01 [0-1] (1)   | 0                | 0.01 [0-2] (1)  | 0.03 [0-4] (1)   | 0.04 [0-3] (3)   | 0.02 [0-2] (1)   |
|                             | Social worker                    | 0.08 [0-7] (4)                | 0.04 [0-6] (3)   | 0.02 [0-2] (2)   | 0.06 [0-4] (3)   | 0.06 [0-6] (4)   | 0.03 [0-3] (3)   | 0.14 [0-20] (2)  | 0.07 [0-5] (4)   | 0.05 [0-4] (4)  | 0.02 [0-2] (2)   | 0.06 [0-4] (3)   | 0.06 [0-3] (4)   |
|                             | Occupational therapist           | 0.09 [0-4] (9)                | 0.15 [0-6] (14)  | 0.09 [0-4] (9)   | 0.05 [0-3] (5)   | 0.10 [0-6] (7)   | 0.03 [0-2] (5)   | 0.17 [0-20] (5)  | 0.07 [0-3] (7)   | 0.03 [0-2] (3)  | 0.02 [0-2] (1)   | 0.29 [0-27] (5)  | 0.05 [0-5] (2)   |
|                             | Psychologist                     | 0.07 [0-4] (8)                | 0.16 [0-8] (10)  | 0.09 [0-5] (7)   | 0.06 [0-3] (7)   | 0.20 [0-18] (10) | 0.06 [0-2] (8)   | 0.03 [0-2] (4)   | 0.14 [0-11] (5)  | 0.07 [0-2] (7)  | 0.07 [0-3] (5)   | 0.21 [0-6] (8)   | 0.25 [0-7] (9)   |
|                             | Counsellor                       | 0.02 [0-2] (2)                | 0.10 [0-6] (4)   | 0.18 [0-13] (6)  | 0.07 [0-6] (3)   | 0.20 [0-8] (7)   | 0.29 [0-12] (11) | 0.09 [0-9] (4)   | 0.22 [0-12] (7)  | 0.15 [0-12] (5) | 0.06 [0-6] (3)   | 0.21 [0-16] (8)  | 0.22 [0-12] (5)  |
|                             | Physiotherapist                  | 0.13 [0-6] (7)                | 0.16 [0-6] (10)  | 0.14 [0-6] (9)   | 0.09 [0-12] (4)  | 0.09 [0-4] (7)   | 0.13 [0-10] (7)  | 0.09 [0-7] (5)   | 0.32 [0-10] (11) | 0.16 [0-12] (6) | 0.13 [0-6] (6)   | 0.41 [0-27] (9)  | 22 [0-10] (7)    |
| Secondary care              |                                  |                               |                  |                  |                  |                  |                  |                  |                  |                 |                  |                  |                  |
|                             | Doctor at hospital               | 0.55 [0-3] (74)               | 0.79 [0-6] (86)  | 0.70 [0-6] (83)  | 0.68 [0-3] (86)  | 1.05 [0-61] (85) | 0.79 [0-6] (92)  | 0.61 [0-4] (64)  | 0.63 [0-8] (56)  | 0.64 [0-5] (72) | 0.53 [0-6] (49)  | 0.60 [0-7] (51)  | 0.61 [0-8] (44)  |

|                    |                  |                 |                  |                  |                  |                  |                  |                  |                  |                  |                  |                  |
|--------------------|------------------|-----------------|------------------|------------------|------------------|------------------|------------------|------------------|------------------|------------------|------------------|------------------|
| Nurse at hospital  | 0.47 [0-4] (66)  | 0.59 [0-6] (79) | 0.59 [0-6] (77)  | 0.53 [0-16] (60) | 0.46 [0-4] (62)  | 0.57 [0-6] (72)  | 0.47 [0-5] (53)  | 0.68 [0-13] (55) | 0.53 [0-20] (45) | 0.31 [0-5] (31)  | 0.41 [0-6] (38)  | 0.56 [0-10] (42) |
| Hospital overnight | 0.28 [0-18] (12) | 0.16 [0-6] (13) | 0.15 [0-7] (15)  | 0.09 [0-7] (8)   | 0.09 [0-5] (6)   | 0.12 [0-6] (10)  | 0.24 [0-16] (6)  | 0.52 [0-46] (7)  | 0.24 [0-10] (10) | 0.09 [0-4] (6)   | 0.84 [0-77] (9)  | 0.39 [0-28] (9)  |
| Ambulance          | 0.18 [0-7] (21)  | 0.25 [0-7] (22) | 0.17 [0-4] (19)  | 0.07 [0-2] (11)  | 0.14 [0-6] (13)  | 0.11 [0-3] (17)  | 0.08 [0-3] (9)   | 0.08 [0-2] (8)   | 0.15 [0-5] (14)  | 0.13 [0-2] (13)  | 0.10 [0-3] (9)   | 0.18 [0-5] (10)  |
| A&E visit          | 0.27 [0-7] (28)  | 0.30 [0-5] (31) | 0.23 [0-4] (24)  | 0.15 [0-2] (22)  | 0.21 [0-4] (21)  | 0.21 [0-9] (25)  | 0.27 [0-8] (24)  | 0.30 [0-15] (18) | 0.23 [0-6] (23)  | 0.20 [0-3] (19)  | 0.29 [0-4] (21)  | 0.24 [0-5] (20)  |
| Blood test         | 0.58 [0-11] (58) | 0.36 [0-4] (51) | 0.46 [0-24] (44) | 0.34 [0-12] (42) | 0.70 [0-59] (43) | 0.46 [0-10] (44) | 0.60 [0-16] (45) | 0.48 [0-10] (41) | 0.50 [0-7] (47)  | 0.73 [0-12] (47) | 0.63 [0-7] (42)  | 0.52 [0-5] (40)  |
| Urine test         | 0.14 [0-4] (20)  | 0.13 [0-3] (20) | 0.22 [0-14] (23) | 0.12 [0-2] (18)  | 0.29 [0-28] (18) | 0.18 [0-3] (24)  | 0.16 [0-3] (18)  | 0.13 [0-2] (14)  | 0.07 [0-2] (9)   | 0.15 [0-3] (16)  | 0.15 [0-2] (14)  | 0.28 [0-9] (17)  |
| Ultrasound         | 0.09 [0-2] (16)  | 0.09 [0-3] (13) | 0.09 [0-3] (13)  | 0.06 [0-2] (9)   | 0.05 [0-3] (7)   | 0.13 [0-2] (18)  | 0.07 [0-1] (9)   | 0.05 [0-4] (5)   | 0.08 [0-2] (10)  | 0.04 [0-2] (4)   | 0.07 [0-2] (8)   | 0.14 [0-4] (12)  |
| X-Ray              | 0.13 [0-6] (10)  | 0.10 [0-3] (13) | 0.15 [0-8] (16)  | 0.08 [0-3] (10)  | 0.11 [0-2] (15)  | 0.16 [0-4] (20)  | 0.21 [0-3] (25)  | 0.08 [0-3] (8)   | 0.09 [0-2] 10    | 0.19 [0-6] (16)  | 0.16 [0-5] (14)  | 0.16 [0-3] (15)  |
| CT scan            | 0.07 [0-2] (11)  | 0.08 [0-2] (14) | 0.08 [0-2] (14)  | 0.03 [0-1] (6)   | 0.04 [0-1] (7)   | 0.04 [0-1] (7)   | 0.05 [0-2] (7)   | 0.03 [0-2] (3)   | 0.01 [0-1] (2)   | 0.02 [0-1] (2)   | 0.02 [0-1] (3)   | 0.01 [0-1] (1)   |
| MRI scan           | 0.21 [0-2] (36)  | 0.21 [0-2] (37) | 0.24 [0-2] (41)  | 0.06 [0-2] (10)  | 0.06 [0-1] (11)  | 0.09 [0-2] (15)  | 0.07 [0-2] (9)   | 0.01 [0-1] (1)   | 0.05 [0-1] (7)   | 0.02 [0-1] (2)   | 0.02 [0-1] (2)   | 0.02 [0-1] (3)   |
| EEG                | 0.21 [0-4] (33)  | 0.15 [0-2] (26) | 0.18 [0-2] (32)  | 0.04 [0-1] (7)   | 0.05 [0-1] (8)   | 0.03 [0-1] (6)   | 0.03 [0-1] (4)   | 0.01 [0-1] (2)   | 0.04 [0-2] (5)   | 0.01 [0-1] (1)   | 0.01 [0-1] (1)   | 0.01 [0-1] (1)   |
| Other*             | 0.11 [0-2] (18)  | 0.12 [0-3] (19) | 0.16 [0-7] (19)  | 0.09 [0-2] (12)  | 0.12 [0-2] (19)  | 0.35 [0-18] (18) | 0.09 [0-2] (11)  | 0.07 [0-1] (10)  | 0.10 [0-2] (14)  | 0.42 [0-28] (14) | 0.17 [0-10] (10) | 0.20 [0-3] (18)  |

\**Primary care:* GP out of hours, telephone consultation (GP), MMR, repeat prescription, saliva test

*Community care:* Dentist, orthodontist, school nurse, SENCO, speech therapist, support worker, psychiatrist, Midwife, CAHMS, optician, NHS glasses, cervical smear, podiatrist, podiatrist minor surgery, dietician, NHS direct, hearing test, mammogram

*Outpatients:* Anticoagulant service, long term EEG monitoring, ECG, sleep apnoea test, endoscopy, cystoscopy, contrast fluoroscopy, grommets, tooth extraction, cerebral angiogram, audiologist, PET scan, nasal polypectomy, radio frequency treatment, colonoscopy, minor skin procedures, field exercise test, FESS operation, dexta scan, video telemetry, spinal fluid test, diabetic retinopathy screening, percutaneous biopsy, rib fracture, liver biopsy, radiotherapy, hand fracture, arm fracture, MRSA swabs, prostate biopsy, biopsy (nose, external), cardiac catheterisation, peak flow test, minor dental procedures

*Admitted patient care:* hernia operation, pelvis fracture, implantation of loop recorder, removal of loop recorder, Vaginal tape operation, overnight sleep study, triple heart bypass, foot operation, pacemaker fitted, cholecystectomy, bursa excision, hysterectomy, knee replacement, cyst removal  
*Accident & emergency:* See & treat (no convey), Walk in centre

Table 6. Unit costs of admitted patient care, outpatient and accident & emergency hospital attendances for the most frequent HRG codes for the 24-month trial period. Rounded to nearest 5, \* indicates < 10.

| HRG code                     | Description                                                                                          |       |                                                 | Attendances |     |     |       |
|------------------------------|------------------------------------------------------------------------------------------------------|-------|-------------------------------------------------|-------------|-----|-----|-------|
|                              |                                                                                                      |       |                                                 | LTG         | LEV | ZON | Total |
| <b>Admitted patient care</b> |                                                                                                      |       |                                                 |             |     |     |       |
| AA26H                        | Muscular, Balance, Cranial or Peripheral Nerve Disorders, Epilepsy or Head Injury, with CC Score 0-2 |       |                                                 | 15          | 20  | 20  | 60    |
| SC97Z                        | Same Day Radiotherapy Admission or Attendance (excluding Brachytherapy)                              |       |                                                 | 20          | 0   | 20  | 40    |
| AA26G                        | Muscular, Balance, Cranial or Peripheral Nerve Disorders, Epilepsy or Head Injury, with CC Score 3-5 |       |                                                 | *           | *   | *   | 25    |
| SB97Z                        | Same Day Chemotherapy Admission or Attendance                                                        |       |                                                 | 25          | 0   | 0   | 25    |
| AA33C                        | Conventional EEG, EMG or Nerve Conduction Studies, 19 years and over                                 |       |                                                 | *           | *   | *   | 20    |
| PR02B                        | Paediatric Epilepsy Syndrome with CC Score 1-5                                                       |       |                                                 | *           | *   | *   | 20    |
| AA80Z                        | Complex Long-Term EEG Monitoring                                                                     |       |                                                 | *           | *   | *   | 15    |
| PR02C                        | Paediatric Epilepsy Syndrome with CC Score 0                                                         |       |                                                 | *           | *   | *   | 15    |
| WH50B                        | Procedure Not Carried Out, for Other or Unspecified Reasons                                          |       |                                                 | *           | *   | *   | 10    |
| WH04E                        | Poisoning Diagnosis without Interventions, with CC Score 0-1                                         |       |                                                 | *           | *   | *   | 10    |
| <b>Outpatients</b>           |                                                                                                      |       |                                                 |             |     |     |       |
| 400                          | Neurology                                                                                            | WF01A | Non-Admitted Face-to-Face Attendance, Follow-up | 800         | 840 | 825 | 2465  |
| 400                          | Neurology                                                                                            | WF01B | Non-Admitted Face-to-Face Attendance, First     | 195         | 185 | 160 | 540   |
| 420                          | Paediatrics                                                                                          | WF01A | Non-Admitted Face-to-Face Attendance, Follow-up | 120         | 155 | 145 | 420   |
| 400                          | Neurology                                                                                            | N/A   | N/A                                             | 65          | 80  | 80  | 220   |
| 110                          | Trauma & Orthopaedics                                                                                | WF01A | Non-Admitted Face-to-Face Attendance, Follow-up | 70          | 60  | 65  | 200   |
| 650                          | Physiotherapy                                                                                        | WF01A | Non-Admitted Face-to-Face Attendance, Follow-up | 30          | 55  | 50  | 135   |
| 421                          | Paediatric neurology                                                                                 | WF01A | Non-Admitted Face-to-Face Attendance, Follow-up | 50          | 45  | 22  | 120   |
| 223                          | Paediatric epilepsy                                                                                  | N/A   | N/A                                             | 20          | 20  | 80  | 115   |
| 110                          | Trauma & Orthopaedics                                                                                | N/A   | N/A                                             | 40          | 45  | 30  | 115   |

|                                 |                      |       |                                                                          |     |     |     |     |
|---------------------------------|----------------------|-------|--------------------------------------------------------------------------|-----|-----|-----|-----|
| 320                             | Cardiology           | WF01A | Non-Admitted Face-to-Face Attendance, Follow-up                          | 30  | 40  | 35  | 105 |
| <b>Accident &amp; emergency</b> |                      |       |                                                                          |     |     |     |     |
| N/A                             | N/A                  | ASS02 | See and treat and convey                                                 | 140 | 170 | 185 | 490 |
| T01NA                           | Type 01 non admitted | VB09Z | Emergency Medicine, Category 1 Investigation with Category 1-2 Treatment | 105 | 100 | 90  | 295 |
| T01NA                           | Type 01 non admitted | VB08Z | Emergency Medicine, Category 2 Investigation with Category 1 Treatment   | 50  | 55  | 70  | 180 |
| T01NA                           | Type 01 non admitted | VB11Z | Emergency Medicine, No Investigation with No Significant Treatment       | 30  | 25  | 30  | 85  |
| T01A                            | Type 01 admitted     | VB09Z | Emergency Medicine, Category 1 Investigation with Category 1-2 Treatment | 25  | 30  | 25  | 75  |
| T01A                            | Type 01 admitted     | VB08Z | Emergency Medicine, Category 2 Investigation with Category 1 Treatment   | 20  | 25  | 25  | 65  |
| T01NA                           | Type 01 non admitted | VB07Z | Emergency Medicine, Category 2 Investigation with Category 2 Treatment   | 15  | 30  | 20  | 60  |
| T04NA                           | Type 04 non admitted | VB09Z | Emergency Medicine, Category 1 Investigation with Category 1-2 Treatment | *   | *   | *   | 45  |
| T01A                            | Type 01 admitted     | VB04Z | Emergency Medicine, Category 2 Investigation with Category 4 Treatment   | 15  | 15  | 15  | 45  |
| T03NA                           | Type 03 non admitted | VB09Z | Emergency Medicine, Category 1 Investigation with Category 1-2 Treatment | *   | *   | *   | 35  |

CC – complication or comorbidity

Table 7. Aggregated cost totals (imputed, discounted)

| Time period                                      | Totals (discounted) at 24 months |                      |                      | Difference         |                     |                     |
|--------------------------------------------------|----------------------------------|----------------------|----------------------|--------------------|---------------------|---------------------|
| Arm                                              | LTG                              | LEV                  | ZON                  | LEV-LTG            | ZON-LTG             | ZON-LEV             |
| <b>Primary and Community care</b>                | 682<br>(551, 1018)               | 1303<br>(981, 2009)  | 1013<br>(786, 1631)  | 622<br>(148, 1274) | 331<br>(-31, 940)   | -290<br>(-979, 398) |
| <b>Primary care</b><br>Mean [95% CR]             | 332<br>(284, 423)                | 532<br>(416, 724)    | 411<br>(347, 567)    | 200<br>(59, 391)   | 79<br>(-25, 236)    | -121<br>(-306, 82)  |
| <b>Community care</b><br>Mean [95% CR]           | 350<br>(228, 646)                | 771<br>(489, 1381)   | 602<br>(374, 1117)   | 422<br>(5, 1028)   | 253<br>(-95, 778)   | -169<br>(-795, 409) |
| <b>Secondary care</b>                            | 3025<br>(2606, 3628)             | 3263<br>(2853, 3723) | 3882<br>(3140, 4670) | 237<br>(-486, 847) | 857<br>(-69, 1680)  | 619<br>(-215, 1509) |
| <b>Admitted patient care</b><br>Mean [95% CR]    | 1170<br>(855, 1631)              | 1156<br>(869, 1443)  | 1663<br>(1153, 2246) | -15<br>(-560, 400) | 493<br>(-178, 1127) | 507<br>(-75, 1207)  |
| <b>Outpatient</b><br>Mean [95% CR]               | 1519<br>(1393, 1664)             | 1705<br>(1552, 1876) | 1784<br>(1547, 2050) | 186<br>(-26, 401)  | 266<br>(-17, 564)   | 80<br>(-202, 392)   |
| <b>Accident &amp; emergency</b><br>Mean [95% CR] | 336<br>(269, 425)                | 402<br>(314, 528)    | 434<br>(316, 582)    | 66<br>(-64, 199)   | 98<br>(-55, 259)    | 32<br>(-153, 220)   |
| <b>Medicines</b>                                 | 356<br>(294, 475)                | 508<br>(412, 665)    | 515<br>(423, 668)    | 151<br>(-10, 304)  | 158<br>(15, 316)    | 7<br>(-154, 193)    |
| <b>Anti-seizure medication</b><br>Mean [95% CR]  | 125<br>(103, 158)                | 248<br>(213, 292)    | 269<br>(244, 298)    | 28<br>(75, 171)    | 14<br>(104, 184)    | -14<br>(-24, 68)    |
| <b>Concomitant medication</b><br>Mean [95% CR]   | 231<br>(175, 348)                | 260<br>(172, 403)    | 246<br>(161, 390)    | 123<br>(-122, 171) | 144<br>(-126, 168)  | 21<br>(-165, 162)   |
| <b>TOTAL</b>                                     | 4063 (3617, 4842)                | 5074 (4433, 6049)    | 5409 (4584, 6658)    | 1011 (-36, 2066)   | 1347 (266, 2550)    | 336 (-926, 1634)    |

### *Utilities and Quality adjusted life years*

The distribution of participants' responses to the EQ-5D-3L-Y and the NEWQOL-6D questionnaires by randomised treatment group are presented in Figures 1 and 2. Based on imputed data, baseline utilities were 0.766 (97.5% CR 0.733, 0.804) for levetiracetam, 0.800 (97.5% CR 0.760, 0.830) for zonisamide and 0.779 (97.5% CR 0.751, 0.818) for lamotrigine. In the base-case, adjusted analysis, levetiracetam was associated with a QALY of 1.474 (97.5% CR 1.393, 1.523) over the 2-year time horizon, whilst zonisamide was associated with a QALY of 1.502 (97.5% CR 1.418, 1.566), compared with lamotrigine 1.605 (97.5% CR 1.547, 1.651). This corresponded to a negative incremental QALY of -0.025 (97.5% CR -0.058, 0.129) between levetiracetam and zonisamide. The incremental QALYs of -0.103 (97.5% CR -0.201, -0.015) between zonisamide and lamotrigine, and -0.128 (97.5% CR -0.219, -0.065) between levetiracetam and lamotrigine were significant.

QALYs based on the NEWQOL-6D were calculated for complete case data only, over the 2-year time horizon. Levetiracetam was associated with adjusted QALYs of 1.703 (97.5% CR 1.678, 1.727) compared with 1.712 (97.5% CR 1.690, 1.735) for zonisamide, and 1.710 (97.5% CR 1.687, 1.733) for lamotrigine. Levetiracetam was therefore associated with a negative incremental QALY of -0.009 (97.5% CR -0.033, 0.019) compared with zonisamide, and associated with a negative incremental QALY of -0.010 (97.5% CR -0.035, 0.019) compared with lamotrigine. The incremental QALY between zonisamide and lamotrigine was 0.002 (97.5% CR -0.021, 0.025).

The distribution of responses to the EQ-VAS is illustrated in Table 8. The adjusted analysis based on the EQ-VAS resulted in a QALY of 1.398 (97.5% CR 1.324, 1.479) for levetiracetam, 1.418 (97.5% CR 1.351, 1.456) for zonisamide, and 1.431 (97.5% CR 1.360, 1.476) for lamotrigine. The negative incremental QALYs of -0.020 (97.5% CR -0.094, 0.085) for levetiracetam versus zonisamide, -0.013 (97.5% CR -0.085, 0.060) for zonisamide versus lamotrigine, and -0.033 (97.5% CR -0.112, 0.075) for levetiracetam versus lamotrigine are consistent with the base-case EQ-5D.

Figure 1. Distribution of participants' responses to each EQ-5D attribute, by treatment allocated and time. Levels range from 1 to 3, with 3 representing the most severe problem. The percentage of completed responses (%). (a) Mobility; (b) self-care; (c) usual activities; (d) pain or discomfort; (e) anxiety or depression.

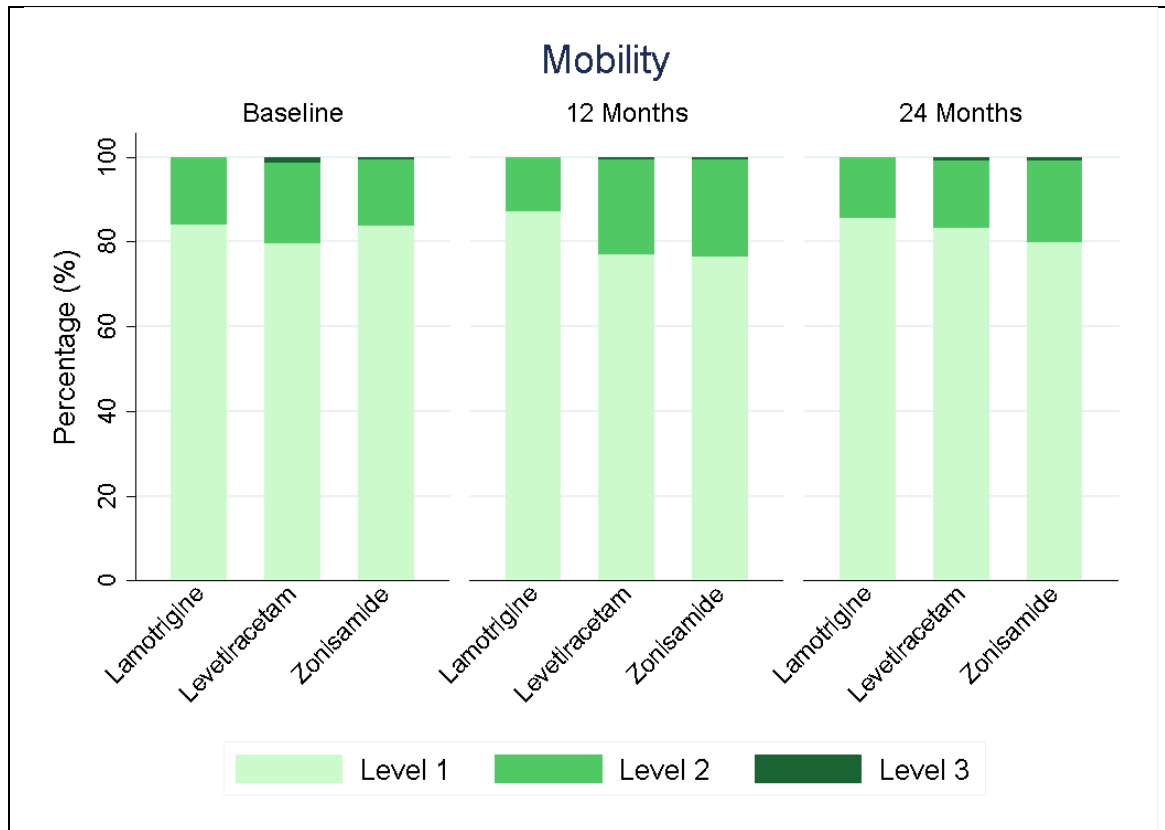



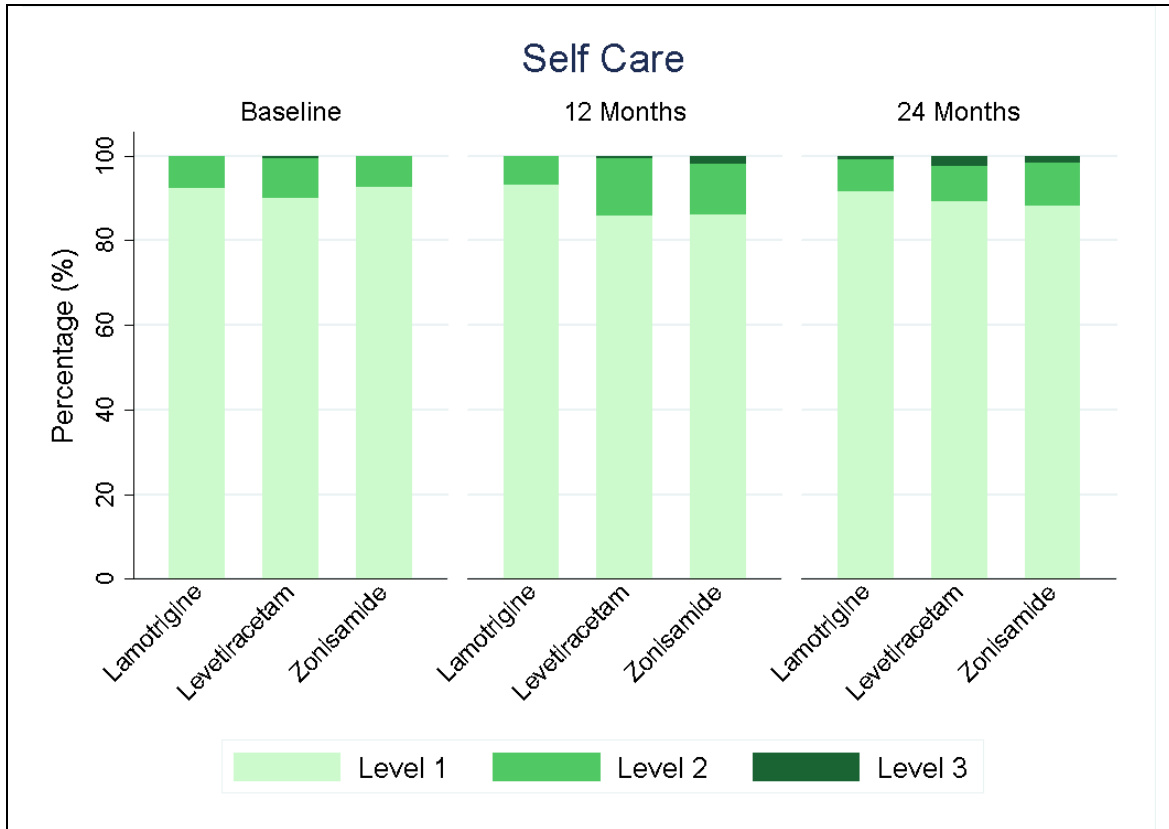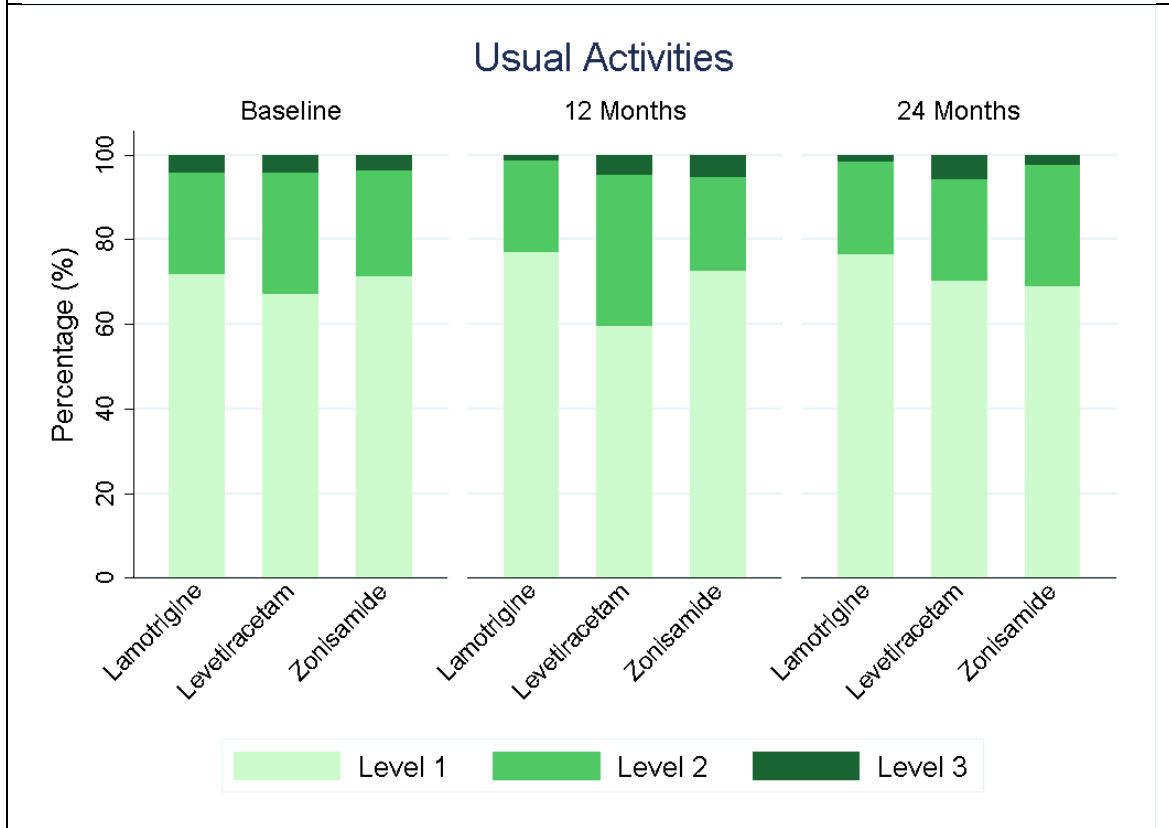

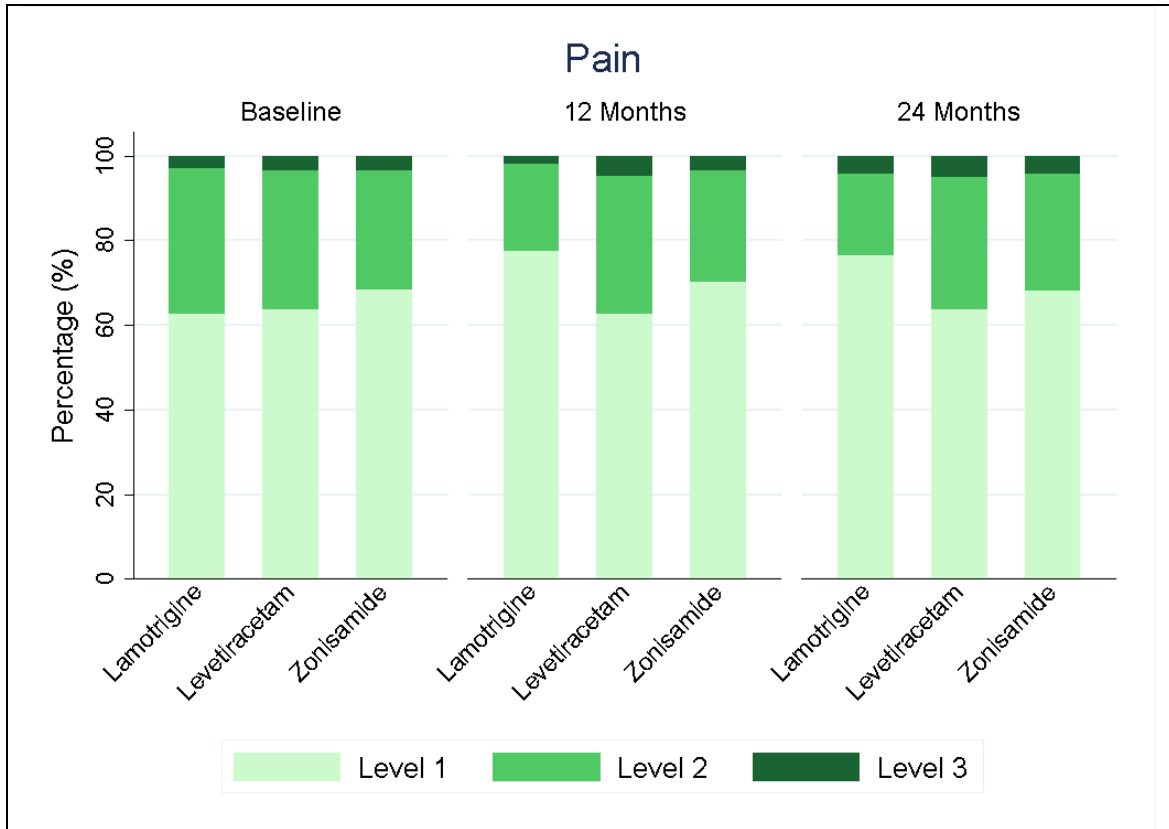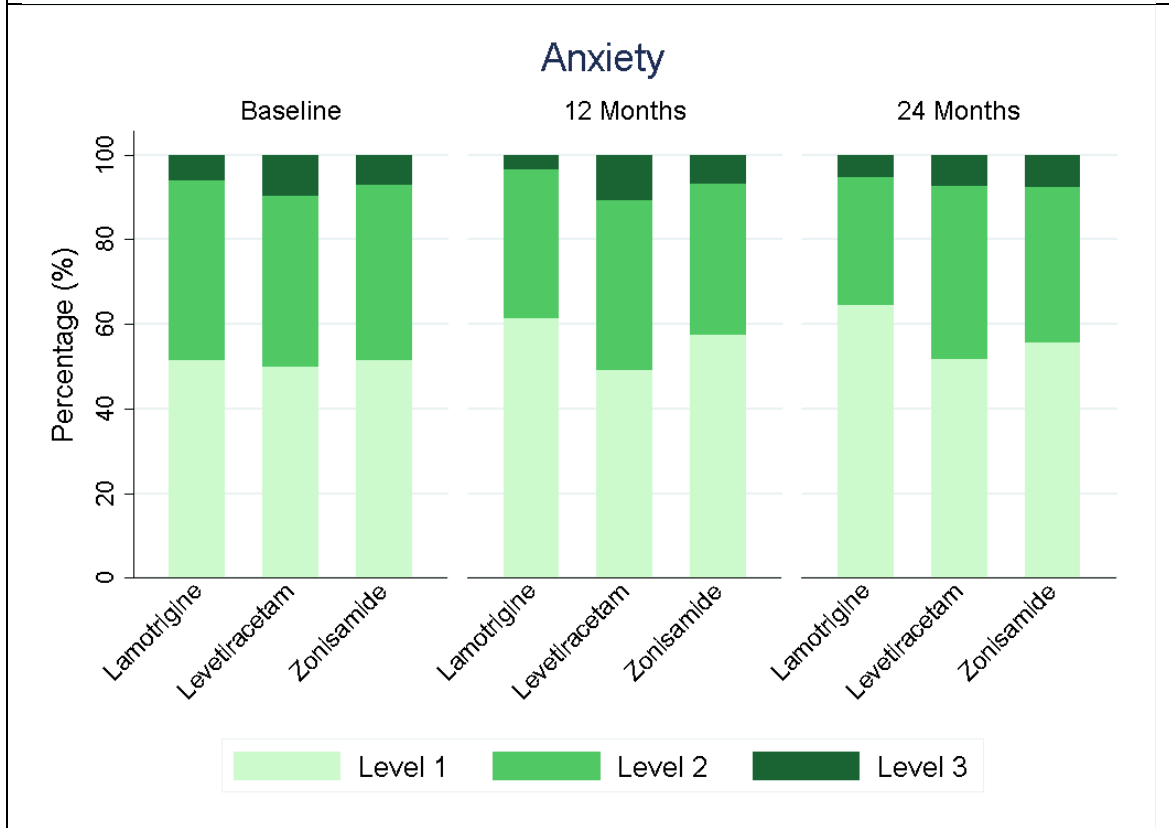

Figure 2. Distribution of participants' responses to each NEWQOL-6D attribute, by treatment allocated and time. Levels range from 1 to 4, with 4 representing the most severe problem. The percentage of completed responses (%). (a) Worry; (b) Depression; (c) Memory; (d) Concentration; (e) Control; (f) Stigma.

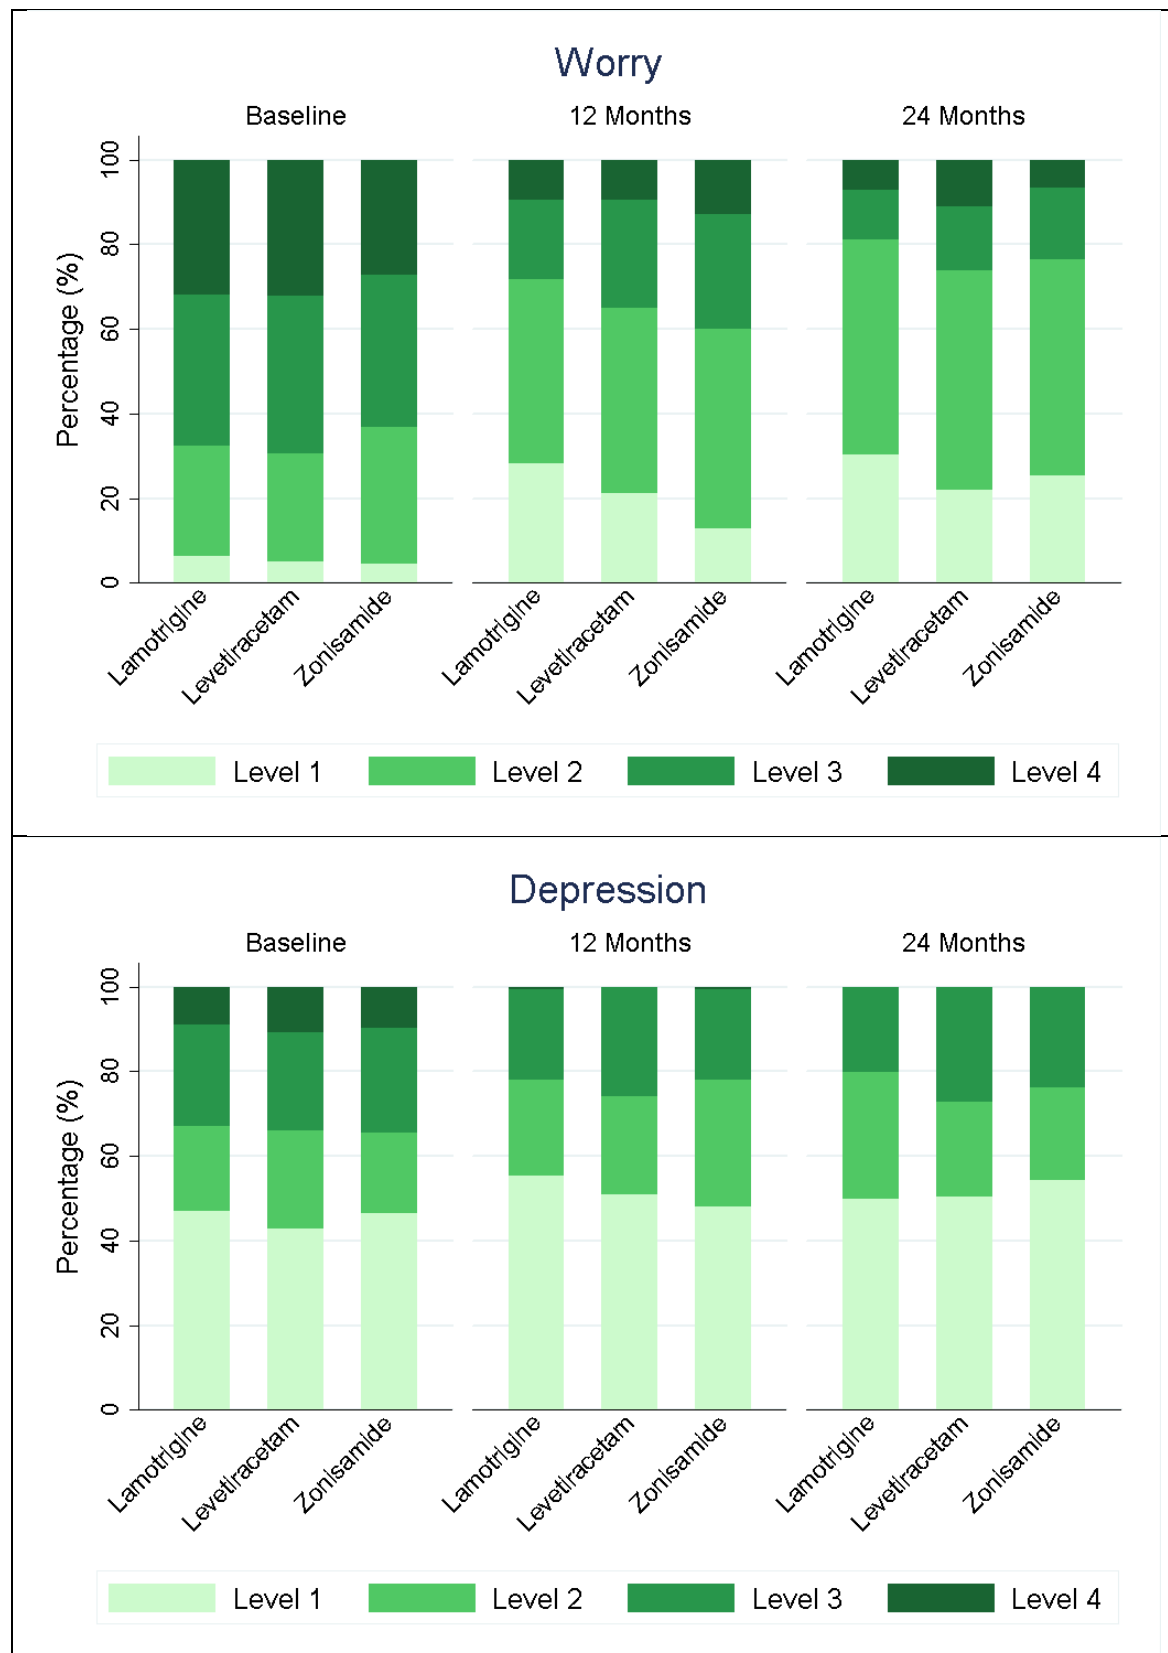

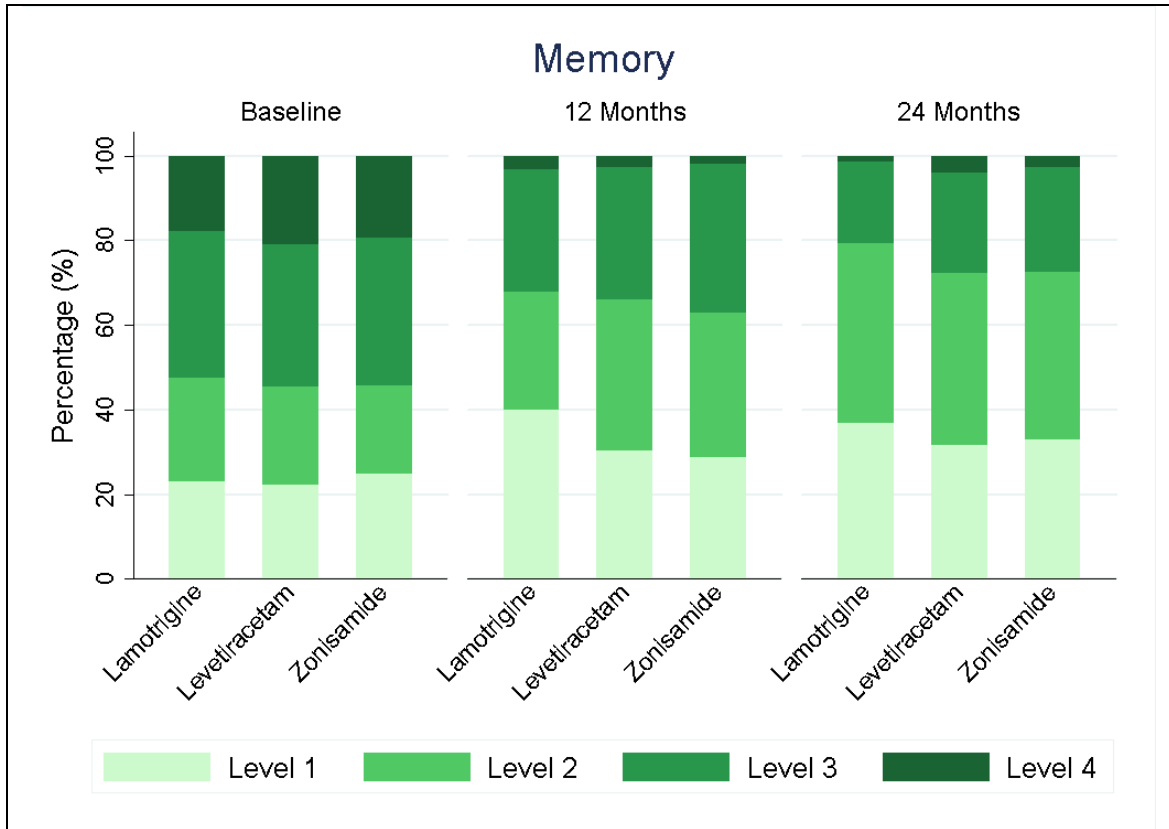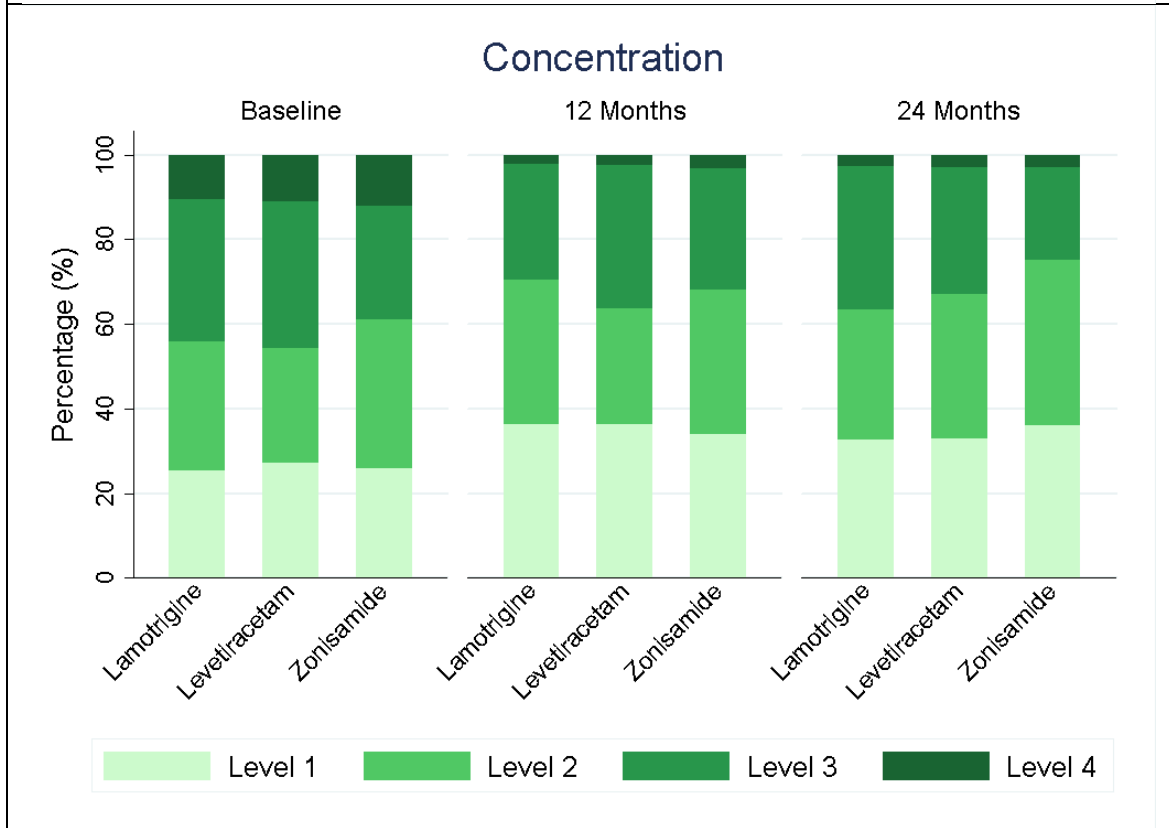

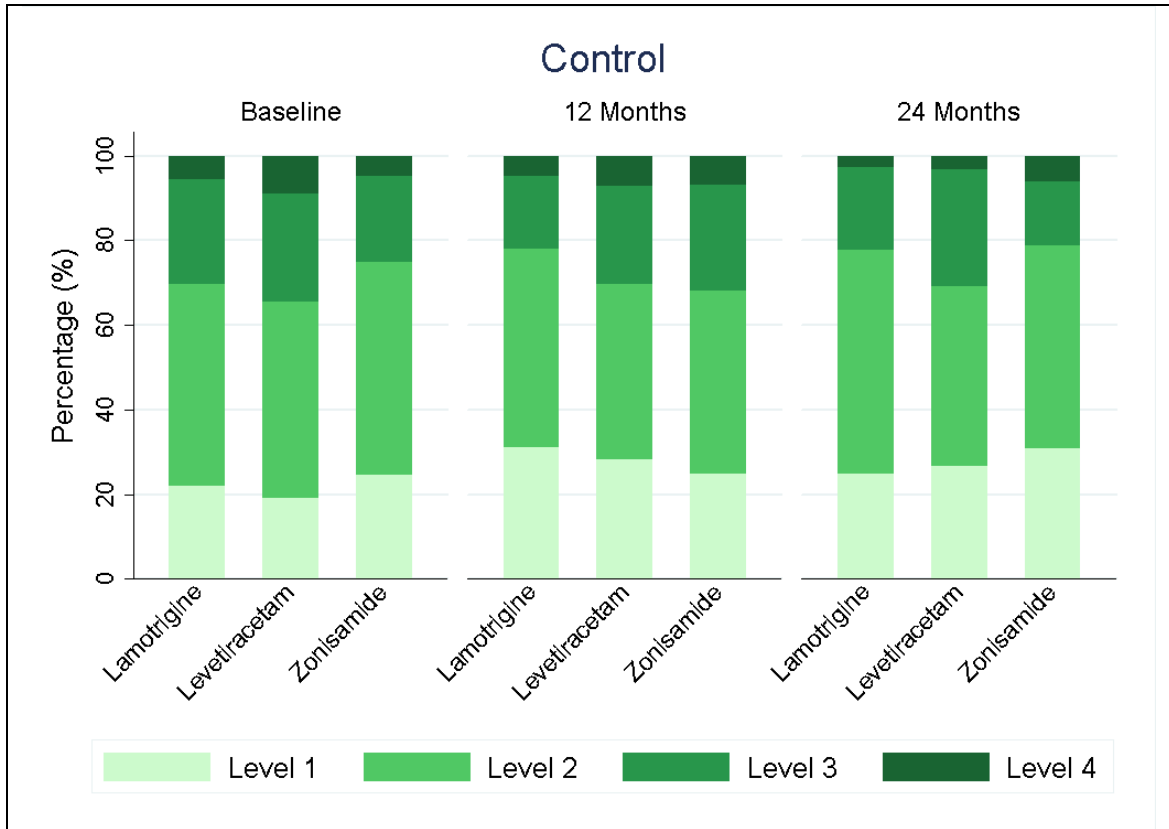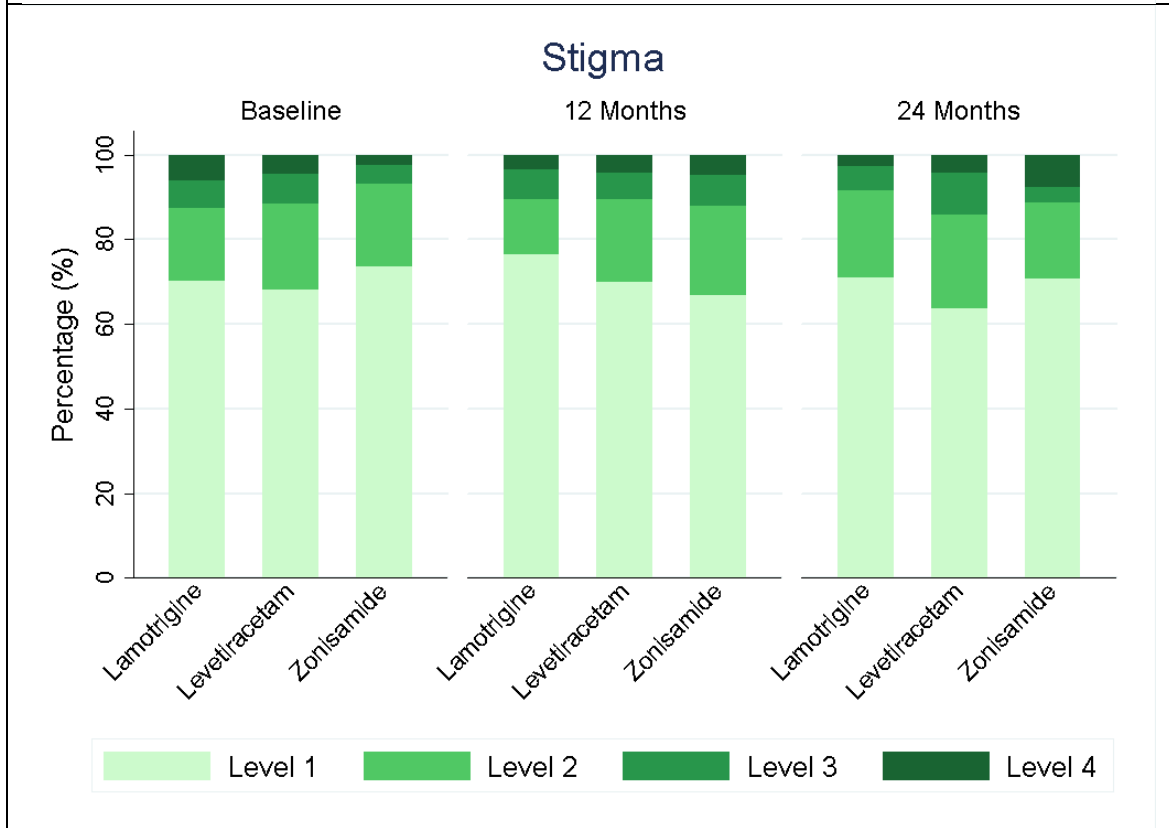

Table 8. Responses to the EQ-VAS thermometer, by version and intervention group.

|           | Lamotrigine |                      | Levetiracetam |                      | Zonisamide |                      |
|-----------|-------------|----------------------|---------------|----------------------|------------|----------------------|
|           | n           | Mean (97.5 CI)       | n             | Mean (97.5 CI)       | n          | Mean (97.5 CI)       |
| Baseline  | 188         | 0.712 (0.681, 0.744) | 187           | 0.707 (0.672, 0.743) | 190        | 0.751 (0.717, 0.784) |
| 12 months | 127         | 0.767 (0.722, 0.812) | 124           | 0.706 (0.656, 0.757) | 130        | 0.712 (0.664, 0.759) |
| 24 months | 106         | 0.752 (0.701, 0.803) | 106           | 0.715 (0.656, 0.774) | 109        | 0.726 (0.673, 0.780) |

#### *Incremental analysis*

Based on the point estimate mean costs and QALYs, both levetiracetam and zonisamide were more costly and less effective than lamotrigine, and were therefore dominated, meaning that they are not considered to be cost-effective. Zonisamide is associated with a negative incremental net health benefit of -0.171 (97.5% CR -0.295, -0.055) compared with lamotrigine, whilst levetiracetam is associated with a negative health benefit compared with zonisamide -0.010 (97.5% CR -0.142, 0.112) at a cost-effectiveness threshold of £20,000 per QALY.

#### *Sensitivity analyses*

Table 9 presents the results of the sensitivity analyses, which are consistent with the base-case for all analyses other than the NEWQOL-6D, where the net health benefit for levetiracetam is higher than for zonisamide at the £20,000 per QALY cost-effectiveness threshold, and the complete case analysis where levetiracetam is associated with lower costs than lamotrigine, though lamotrigine is still associated with the higher net health benefit.

The cost-effectiveness acceptability curve (Figure 3) indicates that the probability of levetiracetam being the most cost-effective at a cost-effectiveness threshold of £20,000 per QALY, is 0, whilst the probability for zonisamide is 0.001.

Table 9: Results of sensitivity analyses. Anti-seizure medications ranked by cost-effectiveness, based on net health benefit at a cost-effectiveness threshold of £20,000 per QALY. Unless stated, incremental values are versus the row above.

|                                                             |                      | Mean (97.5% CR)         |                         |                         |                            |                            |
|-------------------------------------------------------------|----------------------|-------------------------|-------------------------|-------------------------|----------------------------|----------------------------|
|                                                             | Total cost (£)       | QALYs                   | NHB at £20,000 per QALY | NHB at £30,000 per QALY | INHB £20,000 per QALY      | INHB £30,000 per QALY      |
| Base case (n=990)                                           |                      |                         |                         |                         |                            |                            |
| LTG                                                         | 4042<br>(3626, 4983) | 1.605<br>(1.547, 1.651) | 1.403<br>(1.319, 1.458) | 1.470<br>(1.399, 1.520) |                            |                            |
| ZON                                                         | 5400<br>(4659, 6770) | 1.502<br>(1.418, 1.566) | 1.232<br>(1.112, 1.307) | 1.322<br>(1.215, 1.392) | -0.171<br>(-0.295, -0.055) | -0.148<br>(-0.261, -0.045) |
| LEV                                                         | 5104<br>(4450, 6141) | 1.474<br>(1.393, 1.523) | 1.222<br>(1.110, 1.283) | 1.307<br>(1.204, 1.361) | -0.010<br>(-0.142, 0.112)  | -0.015<br>(-0.136, 0.089)  |
| 0% Discount rate (costs and QALYs) (base case 3.5%) (n=990) |                      |                         |                         |                         |                            |                            |
| LTG                                                         | 4108<br>(3682, 5059) | 1.633<br>(1.573, 1.680) | 1.428<br>(1.343, 1.484) | 1.496<br>(1.423, 1.546) |                            |                            |
| ZON                                                         | 5483<br>(4727, 6872) | 1.528<br>(1.442, 1.592) | 1.254<br>(1.131, 1.330) | 1.322<br>(1.236, 1.416) | -0.174<br>(-0.300, -0.056) | -0.151<br>(-0.266, -0.045) |
| LEV                                                         | 5189<br>(4517, 6255) | 1.502<br>(1.417, 1.549) | 1.243<br>(1.128, 1.305) | 1.307<br>(1.224, 1.385) | -0.011<br>(-0.146, 0.114)  | -0.016<br>(-0.139, 0.091)  |
| 6% Discount rate (costs and QALYs) (base case 3.5%) (n=990) |                      |                         |                         |                         |                            |                            |
| LTG                                                         | 3998<br>(3587, 4935) | 1.586<br>(1.529, 1.632) | 1.386<br>(1.303, 1.440) | 1.453<br>(1.382, 1.501) |                            |                            |
| ZON                                                         | 5344<br>(4613, 6698) | 1.485<br>(1.402, 1.548) | 1.218<br>(1.100, 1.291) | 1.307<br>(1.201, 1.376) | -0.168<br>(-0.291, -0.055) | -0.146<br>(-0.258, -0.044) |
| LEV                                                         | 5046<br>(4405, 6066) | 1.461<br>(1.378, 1.505) | 1.208<br>(1.097, 1.268) | 1.292<br>(1.191, 1.346) | -0.010<br>(-0.139, 0.111)  | -0.014<br>(-0.133, 0.089)  |
| Unadjusted (base case adjusted) (n=990)                     |                      |                         |                         |                         |                            |                            |
| LTG                                                         | 4063<br>(3617, 4842) | 1.600<br>(1.524, 1.649) | 1.397<br>(1.301, 1.450) | 1.465<br>(1.374, 1.515) |                            |                            |
| ZON                                                         | 5409<br>(4584, 6658) | 1.521<br>(1.431, 1.591) | 1.251<br>(1.078, 1.278) | 1.341<br>(1.176, 1.354) | -0.146<br>(-0.279, -0.006) | -0.124<br>(-0.247, 0.005)  |

|                                                                                             |                      |                         |                         |                         |                              |                              |
|---------------------------------------------------------------------------------------------|----------------------|-------------------------|-------------------------|-------------------------|------------------------------|------------------------------|
| LEV                                                                                         | 5074<br>(4433, 6049) | 1.459<br>(1.362, 1.517) | 1.205<br>(1.129, 1.339) | 1.290<br>(1.233, 1.421) | -0.045<br>(-0.195, 0.095)    | -0.051<br>(-0.183, 0.076)    |
| Complete case data (cost n = 178; EQ-5D n=225) (base case imputed)                          |                      |                         |                         |                         |                              |                              |
| LTG                                                                                         | 3635<br>(2431, 4828) | 1.628<br>(1.576, 1.684) | 1.446<br>(1.367, 1.537) | 1.507<br>(1.440, 1.583) |                              |                              |
| LEV                                                                                         | 3294<br>(2063, 4504) | 1.481<br>(1.418, 1.545) | 1.316<br>(1.234, 1.401) | 1.371<br>(1.299, 1.444) | -0.131 ( -0.244, -<br>0.024) | -0.136 ( -0.233, -<br>0.045) |
| ZON                                                                                         | 4704<br>(3375, 6255) | 1.548<br>(1.483, 1.601) | 1.313<br>(1.200, 1.405) | 1.391<br>(1.296, 1.466) | -0.003 ( -0.094, 0.109)      | 0.020 ( -0.094, 0.109)       |
| Per protocol (n=959) (base case all participants, intention to treat)                       |                      |                         |                         |                         |                              |                              |
| LTG                                                                                         | 4052<br>(3626, 5023) | 1.605<br>(1.546, 1.650) | 1.402<br>(1.315, 1.456) | 1.470<br>(1.397, 1.519) |                              |                              |
| ZON                                                                                         | 5118<br>(4702, 6826) | 1.503<br>(1.420, 1.565) | 1.229<br>(1.114, 1.304) | 1.320<br>(1.217, 1.390) | -0.174<br>(-0.294, -0.059)   | -0.150<br>(-0.255, -0.046)   |
| LEV                                                                                         | 5480<br>(4465, 6185) | 1.478<br>(1.394, 1.523) | 1.221<br>(1.401, 1.280) | 1.307<br>(1.202, 1.361) | -0.007<br>(-0.137, 0.111)    | -0.013<br>(-0.131, 0.088)    |
| NEWQOL-6D (base case EQ-5D) (costs as base case, NEWQOL-6D based on n = 132 complete cases) |                      |                         |                         |                         |                              |                              |
| LTG                                                                                         | 4042<br>(3626, 4983) | 1.710<br>(1.687, 1.733) | 1.508<br>(1.455, 1.567) | 1.575<br>(1.536, 1.600) |                              |                              |
| LEV                                                                                         | 5104<br>(4450, 6141) | 1.703<br>(1.678, 1.727) | 1.448<br>(1.390, 1.488) | 1.533<br>(1.489, 1.565) | -0.060<br>(-0.119, -0.004)   | -0.042<br>(-0.086, -0.000)   |
| ZON                                                                                         | 5400<br>(4659, 6770) | 1.712<br>(1.690, 1.735) | 1.442<br>(1.368, 1.483) | 1.532<br>(1.479, 1.564) | -0.006<br>(-0.081, 0.060)    | -0.001<br>(-0.054, 0.045)    |
| EQ-VAS (base case EQ-5D) (n=990)                                                            |                      |                         |                         |                         |                              |                              |
| LTG                                                                                         | 4042<br>(3626, 4983) | 1.431<br>(1.360, 1.476) | 1.229<br>(1.127, 1.281) | 1.296<br>(1.207, 1.346) |                              |                              |
| ZON                                                                                         | 5400<br>(4659, 6770) | 1.418<br>(1.351, 1.456) | 1.148<br>(1.044, 1.200) | 1.238<br>(1.148, 1.283) | -0.081<br>(-0.183, 0.016)    | -0.005<br>(-0.147, 0.028)    |
| LEV                                                                                         | 5104<br>(4450, 6141) | 1.398<br>(1.324, 1.479) | 1.142<br>(1.042, 1.223) | 1.227<br>(1.138, 1.308) | -0.150<br>(-0.102, 0.121)    | -0.013<br>(-0.093, 0.105)    |
| Treating blank responses in the questionnaire as missing rather than zero                   |                      |                         |                         |                         |                              |                              |
| LTG                                                                                         | 4059                 | 1.605                   | 1.402                   | 1.470                   |                              |                              |



|     |      |                         |       |       |        |        |
|-----|------|-------------------------|-------|-------|--------|--------|
|     |      | (1.547, 1.651)          |       |       |        |        |
| ZON | 5532 | 1.502<br>(1.418, 1.566) | 1.226 | 1.318 | -0.176 | -0.152 |
| LEV | 5100 | 1.474<br>(1.393, 1.523) | 1.222 | 1.307 | -0.003 | -0.010 |

Figure 3. Cost effectiveness acceptability curve. Dashed lines represent cost-effectiveness thresholds of £20,000 per QALY and £30,000 per QALY.

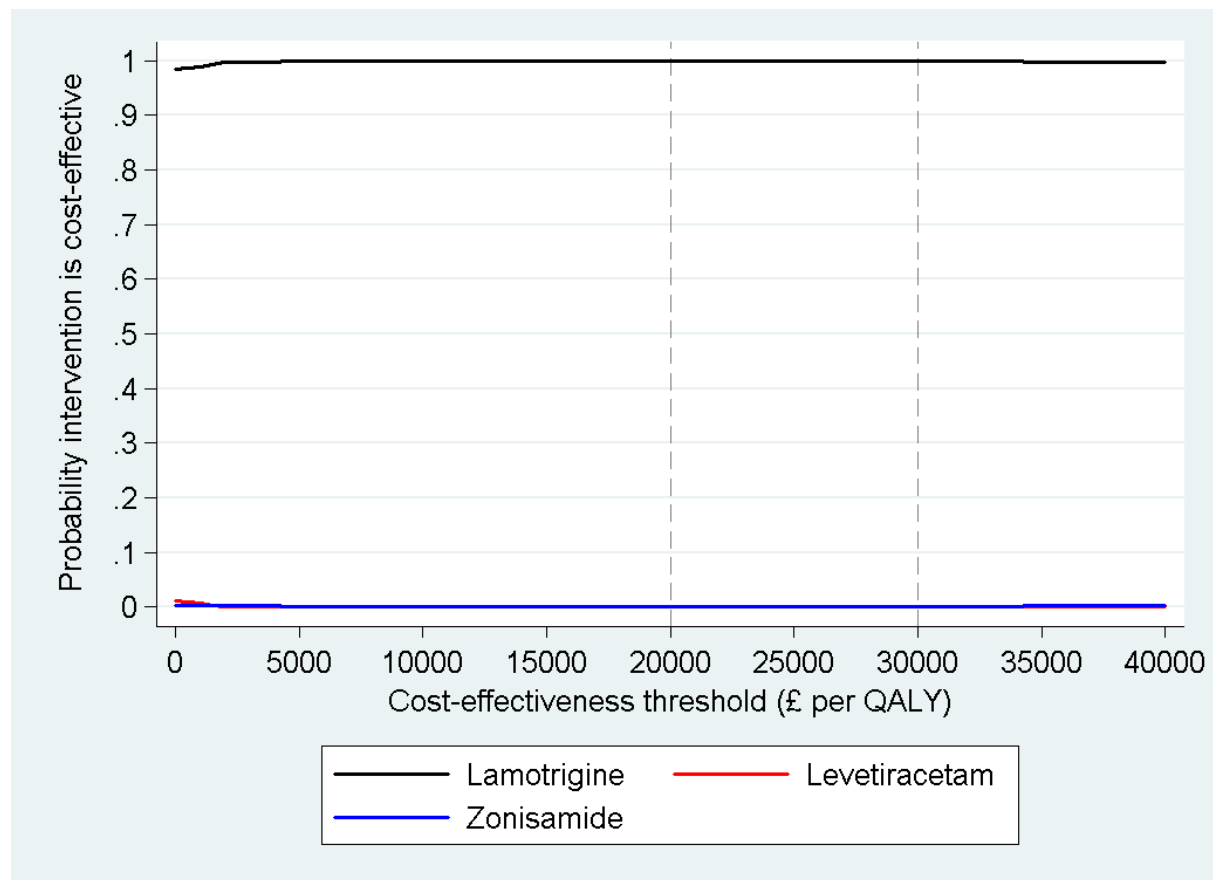

#### Sub-group analyses

The results of the subgroup analysis for adults, are consistent with the base-case analysis for the whole population (Table 10). For children, however, lamotrigine is associated with the highest costs £5076 (97.5% CR £3815, £7219), compared with levetiracetam £4972 (97.5% CR £3739, £6840), and zonisamide £4638 (97.5% CR £3826, £6974). Levetiracetam is associated with higher QALYs than lamotrigine, and therefore lamotrigine is dominated. Zonisamide has a lower cost, and lower QALYs than levetiracetam, but also a lower net health benefit at a cost-effectiveness threshold of £20,000 per QALY, and is therefore not cost effective at that threshold.

Table 10: Results of sub-group analysis. Anti-seizure medications ranked by cost-effectiveness, based on net health benefit at a cost-effectiveness threshold of £20,000 per QALY. Incremental values are versus the row above.

|                                       | Mean (97.5% CR)      |                         |                         |                         |                            |                            |
|---------------------------------------|----------------------|-------------------------|-------------------------|-------------------------|----------------------------|----------------------------|
|                                       | Total cost (£)       | QALYs                   | NHB at £20,000 per QALY | NHB at £30,000 per QALY | INHB £20,000 per QALY      | INHB £30,000 per QALY      |
| Base-case (n=990)                     |                      |                         |                         |                         |                            |                            |
| LTG                                   | 4042<br>(3626, 4983) | 1.605<br>(1.547, 1.651) | 1.403<br>(1.319, 1.458) | 1.470<br>(1.399, 1.520) |                            |                            |
| ZON                                   | 5400<br>(4659, 6770) | 1.502<br>(1.418, 1.566) | 1.232<br>(1.112, 1.307) | 1.322<br>(1.215, 1.392) | -0.171<br>(-0.295, -0.055) | -0.148<br>(-0.261, -0.045) |
| LEV                                   | 5104<br>(4450, 6141) | 1.474<br>(1.393, 1.523) | 1.222<br>(1.110, 1.283) | 1.307<br>(1.204, 1.361) | -0.010<br>(-0.142, 0.112)  | -0.015<br>(-0.136, 0.089)  |
| Children aged under 16 years (n=155)  |                      |                         |                         |                         |                            |                            |
| LEV                                   | 4972<br>(3739, 6840) | 1.556<br>(1.397, 1.618) | 1.307<br>(1.097, 1.394) | 1.390<br>(1.207, 1.463) |                            |                            |
| LTG                                   | 5076<br>(3815, 7219) | 1.551<br>(1.432, 1.638) | 1.297<br>(1.107, 1.412) | 1.382<br>(1.221, 1.481) | -0.010<br>(-0.171, 0.191)  | -0.009<br>(-0.148, 0.173)  |
| ZON                                   | 4638<br>(3826, 6974) | 1.508<br>(1.381, 1.610) | 1.277<br>(1.068, 1.390) | 1.354<br>(1.176, 1.460) | -0.020<br>(-0.242, 0.175)  | -0.028<br>(-0.214, 0.143)  |
| Adults aged 16 years and over (n=835) |                      |                         |                         |                         |                            |                            |
| LTG                                   | 3844<br>(3379, 4478) | 1.612<br>(1.554, 1.661) | 1.420<br>(1.346, 1.475) | 1.484<br>(1.417, 1.536) |                            |                            |
| ZON                                   | 5509<br>(4610, 6866) | 1.508<br>(1.413, 1.569) | 1.227<br>(1.101, 1.320) | 1.319<br>(1.209, 1.398) | -0.193<br>(-0.322, -0.083) | -0.165<br>(-0.278, -0.067) |
| LEV                                   | 5178<br>(4435, 6223) | 1.466<br>(1.381, 1.518) | 1.207<br>(1.095, 1.280) | 1.294<br>(1.193, 1.359) | -0.020<br>(-0.158, 0.112)  | -0.025<br>(-0.149, 0.090)  |

\*Less costly, less effective

## References

1. Husereau D, Drummond M, Petrou S, et al. Consolidated Health Economic Evaluation Reporting Standards (CHEERS)--explanation and elaboration: a report of the ISPOR Health Economic Evaluation Publication Guidelines Good Reporting Practices Task Force. *Value Health* 2013; **16**(2): 231-50.
2. Beecham J KM. Costing psychiatric interventions. In: G T, ed. *Measuring Mental Health Needs*. 2nd ed. London: Gaskell; 2001: 200-24.
3. Marson AG, Appleton R, Baker GA, et al. A randomised controlled trial examining the longer-term outcomes of standard versus new antiepileptic drugs. The SANAD trial. *Health Technol Assess* 2007; **11**(37): iii-iv, ix-x, 1-134.
4. Database of Instruments for Resource Use Management. SANAD-II RUM <https://www.dirum.org/instruments/details/93>.
5. Balabanova S, Taylor C, Silis G, et al. Study protocol for a pragmatic randomised controlled trial comparing the effectiveness and cost-effectiveness of levetiracetam and zonisamide versus standard treatments for epilepsy: a comparison of standard and new antiepileptic drugs (SANAD-II). *BMJ Open* 2020; **10**(8): e040635.
6. National Institute for Health and Care Excellence. *Guide to the Methods of Technology Appraisal 2013. Process and Methods [PMG9]*. 2013.
7. NHS Digital Data Linkage & Extract Service. Available from: <https://digital.nhs.uk/>
8. The Secure Anonymised Information Linkage databank. Available from: <https://saildatabank.com/>.
9. Lomas J, Asaria M, Bojke L, Gale CP, Richardson G, Walker S. Which Costs Matter? Costs Included in Economic Evaluation and their Impact on Decision Uncertainty for Stable Coronary Artery Disease. *Pharmacoecon Open* 2018; **2**(4): 403-13.
10. Reference costs: <https://improvement.nhs.uk/resources/national-cost-collection/> National Cost Collection: National Schedule of NHS costs - Year 2018-19 - NHS trust and NHS foundation trusts.
11. Curtis L BA. *Unit Costs of Health and Social Care 2019*. Unit Costs of Health and Social Care. PSSRU, Kent, UK, 176 pp. ISBN 978-1-911353-10-2.
12. Joint Formulary Committee. *British National Formulary* available from <https://bnf.nice.org.uk/> [Accessed 17th Aug 2020].
13. NHS Business Services Authority. Prescription Cost Analysis (PCA) data September 2019. <https://www.nhsbsa.nhs.uk/prescription-data/dispensing-data/prescription-cost-analysis-pca-data>.
14. Welsh NHS Data dictionary 2020. <http://www.datadictionary.wales.nhs.uk/#!WordDocuments/livedataitemsaz.htm>.
15. NHS Digital. National Casemix Office HRG4+ 2018/19 Payment Grouper. 2019 <https://digital.nhs.uk/services/national-casemix-office/downloads-groupers-and-tools/payment---hrg4-2018-19-local-payment-grouper>
16. Curtis L BA. *Unit Costs of Health and Social Care 2015*, Personal Social Services Research Unit, University of Kent, Canterbury. 2015.
17. Department of Health and NHS England. *Out-of-hours GP services in England*. 2014. <https://www.nao.org.uk/wp-content/uploads/2014/09/Out-of-hours-GP-services-in-England1.pdf> [Accessed 17th Aug 2020].
18. National Health Service. NHS voucher values for glasses and lenses. <https://www.nhs.uk/using-the-nhs/help-with-health-costs/nhs-voucher-values-for-glasses-and-lenses/> [Accessed 17th Aug 2020].
19. Gray E DA, Karssemeijer N, et al. . Evaluation of a Stratified National Breast Screening Program in the United Kingdom: An Early Model-Based Cost-Effectiveness Analysis. doi:10.1016/j.jval.2017.04.012. *Value Health* 2017; **20**(8): 1100-9. .

20. Bains I CY, Soldan K, Jit M. . Clinical impact and cost-effectiveness of primary cytology versus human papillomavirus testing for cervical cancer screening in England. 2019:ijgc-2018-000161. *Int J Gynecol Cancer* 2019.
21. Pope C TJ, Jones J, Pritchard J, Rowsell A, Halford S. . Has the NHS 111 urgent care telephone service been a success? Case study and secondary data analysis in England. *BMJ Open* 2017; **7(5): e014815**.
22. Kind P. The EuroQol Instrument: An Index of Health-Related Quality of Life. *Quality of Life and Pharmacoeconomics in Clinical Trials*, 2, 191-201.; 1996.
23. Mulhern B RD, Jacoby A, Marson T, Snape D, Hughes D, Latimer N, Baker GA, Brazier JE. . The development of a QALY measure for epilepsy: NEWQOL-6D. . *Epilepsy Behav* 2012; **24(1): 36-43**.
24. Dolan P. Modeling valuations for EuroQol health states. *Med Care* 1997; **35(11): 1095-108**.
25. Gabrio A, Mason AJ, Baio G. Handling Missing Data in Within-Trial Cost-Effectiveness Analysis: A Review with Future Recommendations. *Pharmacoecon Open* 2017; **1(2): 79-97**.
26. White I RP, Wood A. . Multiple imputation using chained equations: Issues and guidance for practice. *Stat Med* 2011; **30(4): 377-99**.
27. Graham JW OA, Gilreath TD. . How many imputations are really needed? Some practical clarifications of multiple imputation theory. *Prev Sci* 2007; **8: 206-13**.
28. van Asselt AD vMG, Dirksen CD, Arntz A, Severens JL, Kessels AG. . How to deal with cost differences at baseline. *Pharmacoeconomics* 2009; **27(6): 519-28**.
29. Mihaylova B BA, O'Hagan A, Thompson SG. . Review of statistical methods for analysing healthcare resources and costs. *Health Econ* 2011; **20(8): 897-916**.
30. Paulden M. Calculating and Interpreting ICERs and Net Benefit. *PharmacoEconomics* 2020; **38: 785-807**.
31. Fenwick E CK, Sculpher M. . Representing uncertainty: the role of cost-effectiveness acceptability curves. *Health economics* 2001; **10: 779-87**.
